# Supplementary material for: Activation of transient receptor potential vanilloid 4 is involved in pressure overload-induced cardiac hypertrophy
Source: eLife. 2022 Jun 22;11:e74519. doi: 10.7554/eLife.74519 (PMC9224988; doi:10.7554/eLife.74519)
Supplement: Appendix 1—table 1—source data 1. [file elife-74519-app1-table1-data1.xls]

## Sheet: appendix table 1
	appendix 1- table 1-source data 1
HW/BW& HW/TL	TAC 2D	Body weight（g）	Heart weight（mg）	Tibial length (mm)	HW/BW	HW/TL		TAC 1W	Body weight（g）	Heart weight（mg）	Tibial length (mm)	HW/BW	HW/TL		TAC 2W	Body weight（g）	Heart weight（mg）	Tibial length (mm)	HW/BW	HW/TL		TAC 4W	Body weight（g）	Heart weight（mg）	Tibial length (mm)	HW/BW	HW/TL
	sham 1	22.6	96.5	16.4	4.26991	5.88415		sham 1	22.8	120	17.34	5.26316	6.92042		sham 1	23.1	104.2	16.98	4.51082	6.13663		sham 1	25	115	17.32	4.6	6.63972
	sham 2	22.8	101.3	16.6	4.44298	6.10241		sham 2	25.4	127	17.24	5	7.36659		sham 2	22.3	98.6	17.1	4.42152	5.76608		sham 2	23.9	97.9	17.6	4.09623	5.5625
	sham 3	21.8	96.4	15.8	4.42202	6.10127		sham 3	23.1	123	16.4	5.32468	7.5		sham 3	22.4	100	17.22	4.46429	5.8072		sham 3	24.7	105	17.26	4.25101	6.08343
	sham 4	21.6	92.3	16.2	4.27315	5.69753		sham 4	22	107	16.88	4.86364	6.33886		sham 4	21.8	104	15.96	4.77064	6.51629		sham 4	23.5	112.5	17.1	4.78723	6.57895
	sham 5	22.4	100.3	15.98	4.47768	6.2766		sham 5	21.2	100	16.96	4.71698	5.89623		sham 5	21.2	98.6	16.94	4.65094	5.82054		sham 5	25.5	119.3	17.24	4.67843	6.91995
	sham 6	22.2	98	17	4.41441	5.76471		sham 6	20.8	108	16.76	5.19231	6.44391		sham 6	22.7	102.4	16.98	4.51101	6.03062		sham 6	25.4	118.6	17.26	4.66929	6.87138
	sham 7	21.9	102.1	17.2	4.6621	5.93605		sham 7	22	110	17.22	5	6.38792		sham 7	21.8	96.6	17	4.43119	5.68235
	TAC 1	22.2	99.5	16.34	4.48198	6.08935		TAC 1	20	140	17.16	7	8.15851		TAC 1	21.8	130	16.98	5.9633	7.65607		TAC 1	26	160.1	17.26	6.15769	9.27578
	TAC 2	23	102.3	17	4.44783	6.01765		TAC 2	18.5	160	16.96	8.64865	9.43396		TAC 2	22.3	138	17	6.18834	8.11765		TAC 2	24.1	186.1	17	7.72199	10.9471
	TAC 3	22.6	98	16.4	4.33628	5.97561		TAC 3	19.9	138	16.22	6.93467	8.50801		TAC 3	22.2	140	16.66	6.30631	8.40336		TAC 3	24.4	203.1	17.66	8.32377	11.5006
	TAC 4	23.1	100.2	16.66	4.33766	6.01441		TAC 4	18.9	148	16.88	7.83069	8.76777		TAC 4	22.4	152.2	17.4	6.79464	8.74713		TAC 4	23.1	190.7	17.22	8.25541	11.0743
	TAC 5	22.2	99.8	16.88	4.4955	5.91232		TAC 5	20	130	17.24	6.5	7.5406		TAC 5	21.6	174.2	16.88	8.06481	10.3199		TAC 5	25.3	175.5	17.2	6.93676	10.2035
	TAC 6	22.6	103.2	17.24	4.56637	5.98608		TAC 6	19.6	136	17.4	6.93878	7.81609		TAC 6	23.2	186.2	17.4	8.02586	10.7011		TAC 6	24.8	170.3	17.34	6.86694	9.82122
	TAC 7	22.3	104	17.4	4.66368	5.97701		TAC 7	20	142	16.98	7.1	8.36278		TAC 7	22.8	193.3	17.1	8.47807	11.3041
Nppa mRNA	TAC 2D				TAC 1W				TAC 2W				TAC 4W				Nppb mRNA	TAC 2D				TAC 1W				TAC 2W				TAC 4W
		folds				folds				folds				folds					folds				folds				folds			Sham	folds
	sham 1	1.0276			sham 1	0.503578			sham 1	0.588421			sham 1	1.24435				sham 1	0.962351			sham 1	1.15747			sham 1	0.658016			sham 1	1.15196
	sham 2	1.16125			sham 2	0.352892			sham 2	0.79801			sham 2	1.16517				sham 2	0.72639			sham 2	0.865719			sham 2	1.30522			sham 2	1.48297
	sham 3	1.15212			sham 3	1.78242			sham 3	1.12814			sham 3	0.590472				sham 3	1.08765			sham 3	0.645635			sham 3	1.17146			sham 3	0.365066
	sham 4	1.28448			sham 4	0.902663			sham 4	1.6485			sham 4	8.95172				sham 4	0.768851			sham 4	0.544885			sham 4	0.815231			TAC 1	3.0026
	sham 5	0.70224			sham 5	1.39077			sham 5	0.913189			sham 5	8.3318				sham 5	1.26942			sham 5	1.36867			sham 5	0.753852			TAC 2	2.83514
	sham 6	0.672313			sham 6	1.06768			sham 6	0.923735			sham 6	10.2831				sham 6	1.18533			sham 6	1.41762			sham 6	1.29622			TAC 3	3.3469
														1.12315
	TAC 1	0.773573			TAC 1	28.0878			TAC 1	40.7933			TAC 1	0.979631				TAC 1	0.5779			TAC 1	27.4088			TAC 1	7.38212			sham 4	1.18581
	TAC 2	1.18364			TAC 2	5.11294			TAC 2	43.8546			TAC 2	1.07715				TAC 2	0.771101			TAC 2	8.91043			TAC 2	4.24818			sham 5	1.24529
	TAC 3	0.79157			TAC 3	4.83102			TAC 3	23.495			TAC 3	0.820076				TAC 3	0.591023			TAC 3	10.7979			TAC 3	4.81811			sham 6	0.884799
	TAC 4	1.19043			TAC 4	7.39638			TAC 4	16.7902			TAC 4	5.40212				TAC 4	0.720243			TAC 4	13.5401			TAC 4	4.75294			sham 7	0.684102
	TAC 5	1.28624			TAC 5	11.0935			TAC 5	25.4763			TAC 5	5.94872				TAC 5	0.742649			TAC 5	12.5507			TAC 5	5.52838			TAC 4	3.56726
	TAC 6	1.31949			TAC 6	12.1637			TAC 6	18.391			TAC 6	5.41515				TAC 6	0.798939			TAC 6	19.2287			TAC 6	4.65508			TAC 5	10.121
									TAC 7	18.391			TAC 7	6.56277																TAC 6	8.87654
																														TAC 7	7.17139
Col1a1 mRNA	TAC 2D				TAC 1W				TAC 2W				TAC 4W				Col3a1 mRNA	TAC 2D				TAC 1W				TAC 2W				TAC 4W
		folds				folds				folds				folds					folds			sham 1	folds				folds				folds
	sham 1	1.30486			sham 1	0.635998			sham 1	0.704321			sham 1	1.24243				sham 1	1.14914			sham 2	0.698121			sham 1	0.813863			sham 1	1.19547
	sham 2	1.33054			sham 2	1.50124			sham 2	3.04104			sham 2	1.03676				sham 2	0.887191			sham 3	0.889968			sham 2	2.02265			sham 2	0.93893
	sham 3	1.20205			sham 3	0.924987			sham 3	2.15592			sham 3	0.72081				sham 3	1.25781			sham 4	1.54872			sham 3	2.60104			sham 3	0.865602
	sham 4	1.1456			sham 4	0.841254			sham 4	0.0273883			TAC 1	3.60671				sham 4	0.90356			sham 5	0.994084			sham 4	0.199558			TAC 1	2.14925
	sham 5	0.577107			sham 5	1.43824			sham 5	0.051984			TAC 2	6.71371				sham 5	0.941876			sham 6	1.28722			sham 5	0.2771			TAC 2	4.11486
	sham 6	0.439844			sham 6	0.658285			sham 6	0.0193467			TAC 3	7.28598				sham 6	0.860427				0.58189			sham 6	0.0857877			TAC 3	2.95493
																						TAC 1
	TAC 1	0.691703			TAC 1	1.13486			TAC 1	0.400832			sham 4	1.18581				TAC 1	1.54224			TAC 2	1.43462			TAC 1	1.06797			sham 4	1.33559
	TAC 2	1.13076			TAC 2	1.54432			TAC 2	1.28263			sham 5	1.24529				TAC 2	0.835716			TAC 3	1.50911			TAC 2	1.73892			sham 5	1.2836
	TAC 3	2.54571			TAC 3	0.696376			TAC 3	0.342623			sham 6	0.884799				TAC 3	0.382744			TAC 4	0.936824			TAC 3	0.976923			sham 6	0.679499
	TAC 4	1.95907			TAC 4	1.0967			TAC 4	1.63497			sham 7	0.684102				TAC 4	1.63807			TAC 5	1.39754			TAC 4	5.09017			sham 7	0.701302
	TAC 5	1.44956			TAC 5	0.894959			TAC 5	0.435928			TAC 4	3.56726				TAC 5	0.914525			TAC 6	1.01507			TAC 5	1.10013			TAC 4	3.72946
	TAC 6	0.808905			TAC 6	1.06386			TAC 6	1.89227			TAC 5	10.121				TAC 6	0.946517				1.47882			TAC 6	5.25569			TAC 5	4.69102
													TAC 6	8.87654																TAC 6	5.82919
													TAC 7	7.17139																TAC 7	3.18703
EF &FS	TAC 2D	EF	FS		TAC 1W	EF	FS		TAC 2W	EF	FS		TAC 4W	EF	FS
	sham 1	65.3288	35.3154		sham 1	71.9165	39.3012		sham 1	75.2034	43.061		sham 1	67.7336	37.2147
	sham 2	65.0717	34.5792		sham 2	76.9024	45.4373		sham 2	80.8328	48.1008		sham 2	74.8914	42.5372
	sham 3	70.1944	38.5573		sham 3	65.0461	31.8922		sham 3	73.8086	41.3539		sham 3	66.3889	35.6959
	sham 4	51.9573	26.0239		sham 4	71.9772	39.2248		sham 4	76.191	43.5973		sham 4	67.3876	36.3088
	sham 5	67.4037	36.6009		sham 5	79.8196	49.3027		sham 5	71.4077	39.8378		sham 5	66.0659	35.3652
	sham 6	74.6584	42.351		sham 6	74.3473	42.1669		sham 6	70.5159	38.8685		sham 6	70.2831	38.6589
	sham7	70.0848	38.8404		sham7	63.8024	31.5432		sham7	82.0583	49.5377
	TAC 1	64.166	33.7376		TAC 1	68.231	35.5453		TAC 1	59.2	30.8323		TAC 1	49.9961	24.8916
	TAC 2	55.8005	28.0804		TAC 2	74.4268	41.7596		TAC 2	61.1507	32.0149		TAC 2	36.6614	17.483
	TAC 3	60.5828	31.6567		TAC 3	63.1673	30.8183		TAC 3	58.7054	29.9722		TAC 3	46.8932	22.9251
	TAC 4	52.0264	25.8162		TAC 4	66.5375	33.862		TAC 4	64.3289	34.4138		TAC 4	67.0401	35.8601
	TAC 5	67.2428	36.3782		TAC 5	70.6959	38.1785		TAC 5	52.9028	26.6897		TAC 5	57.665	29.6704
	TAC 6	78.5457	45.9635		TAC 6	69.8058	37.4006		TAC 6	64.1437	33.8097		TAC 6	58.6989	30.3719
	TAC 7	69.4386	37.8006		TAC 7	67.9278	35.1194		TAC 7	60.7244	31.5858

## Sheet: mean±sd
	2D			1W			2W			4W
n	6	6		6	6		6	6		6	6
	Sham	TAC		Sham	TAC		Sham	TAC		Sham	TAC
HW/BW	4.42±0.1(n=7)	4.48±0.1(n=7)		5.05±0.2(n=7)	7.28±0.7*** (n=7)		4.54±0.1(n=7)	7.12±1.0*** (n=7)		4.49±0.6(n=6)	7.13±0.8** (n=6)
HW/TL	5.97±0.2(n=7)	6.00±0.1(n=7)		6.69±0.6(n=7)	8.37±0.6*** (n=7)		5.97±0.3(n=7)	9.32±1.4*** (n=7)		6.34±0.5(n=6)	9.65±1.6*** (n=6)
ANP	1±0.3(n=6)	1.09±0.2(n=6)		1±0.5(n=6)	11.45±8.7(n=6)		1±0.4(n=6)	28.13±11.5***(n=6)		1±0.2(n=7)	7.27±1.9*** (n=7)
BNP	1±0.2(n=6)	0.7±0.1(n=6)		1±0.4(n=6)	15.41±6.8(n=6)		1±0.3(n=6)	5.23±1.1***(n=6)		1±0.4(n=7)	2.65±0.4** (n=7)
collagenaseⅠ	1±0.4(n=6)	1.43±0.7(n=6)		1±0.4(n=6)	1.07±0.3(n=6)		1±1.3(n=6)	1±0.7(n=6)		1±0.2(n=7)	6.76±2.5** (n=7)
collagenaseⅢ	1±0.1(n=6)	1.04±0.5(n=6)		1±0.4(n=6)	1.30±0.2(n=6)		1±1.1(n=6)	2.54±2.1(n=6)		1±0.3(n=7)	3.81±1.2** (n=7)
EF(%)	66.38±7.2(n=7)	63.97±8.9(n=7)		70.97±5.9(n=7)	68.69±3.5(n=7)		75.72±4.4(n=7)	60.16±3.9*** (n=7)		68.79±3.3 (n=6)	52.83±10.6** (n=6)
FS(%)	36.04±5.1(n=7)	34.21±6.7(n=7)		39.84±6.6(n=7)	36.10±3.5(n=7)		43.48±4.0(n=7)	31.33±2.6*** (n=7)		37.63±2.7(n=6)	26.87±6.5** (n=6)
