# Supplementary material for: Activation of transient receptor potential vanilloid 4 is involved in pressure overload-induced cardiac hypertrophy
Source: eLife. 2022 Jun 22;11:e74519. doi: 10.7554/eLife.74519 (PMC9224988; doi:10.7554/eLife.74519)
Supplement: Figure 1—source data 1. [file elife-74519-fig1-data1.xlsx]

## Sheet: figure1-source data 1
Figure 1—Source Data 1
Figure 1—Source Table1
		Figure 1B	TRPV4 protein	2 d		1 w		2 w		4 w
				Sham	TAC	Sham	TAC	Sham	TAC	Sham	TAC
				0.643798	0.674831	0.883834	1.72825	1.32363	1.91323	0.688354	1.98068
				0.848085	1.11827	1.17713	1.287	0.483463	3.5914	0.651622	2.50075
				1.50812	0.615976	0.939037	1.68829	1.19291	3.34925	1.22888	2.65465
				1.21145	0.58285	1.01434	1.554	1.17886	3.53465	0.546387	2.09262
				0.788546	0.855453	0.984727	2.125	0.409787	3.83455	1.37458	3.04867
				0.865702	0.741363	1.00093	1.30885	1.41136	1.94606	1.51018	1.64873
