# Supplementary material for: Activation of transient receptor potential vanilloid 4 is involved in pressure overload-induced cardiac hypertrophy
Source: eLife. 2022 Jun 22;11:e74519. doi: 10.7554/eLife.74519 (PMC9224988; doi:10.7554/eLife.74519)
Supplement: Figure 1—source data 3. [file elife-74519-fig1-data3.xlsx]

## Sheet: figure3-source data 3
	Figure 1—Source Data 3
	Figure 1—Source Table1
	Figure 1E	human TRPV4 protein	Non-failing	Failing
			0.80383	1.53184
			1.0426	1.96496
			1.15357	1.27844
				1.50141
				1.90471
