# Supplementary material for: Activation of transient receptor potential vanilloid 4 is involved in pressure overload-induced cardiac hypertrophy
Source: eLife. 2022 Jun 22;11:e74519. doi: 10.7554/eLife.74519 (PMC9224988; doi:10.7554/eLife.74519)
Supplement: Figure 2—source data 1. [file elife-74519-fig2-data1.xlsx]

## Sheet: FIGURE2-RESOURCE DATA
		Figure 2—Source Data 1
		Figure 2—Source Table 1		1 week				4 weeks					1 week				4 weeks
		Figure 2A	HW/BW (mg/g)	WT		Trpv4 KO		WT		Trpv4 KO		HW/TL（mg/mm)	WT		Trpv4 KO		WT		Trpv4 KO
				Sham	TAC	Sham	TAC	Sham	TAC	Sham	TAC		Sham	TAC	Sham	TAC	Sham	TAC	Sham	TAC
				5.26	7	4.95	5.16	4.6	6.16	4.51	5.08		6.92	8.16	6.3	6.27	6.64	9.28	7.08	6.91
				5	8.65	5.32	5.21	4.1	7.72	4.32	5.2		7.37	9.43	6.45	6.45	5.56	10.95	6.69	6.96
				5.32	6.93	5.19	5	4.25	8.32	4.61	7.63		7.5	8.51	6.45	6.22	6.08	11.5	7.27	10.38
				4.86	7.83	5.02	5.11	4.44	7.67	4.82	5.48		6.34	8.77	6.6	6.77	6.22	11.2	7.05	7.8
				4.72	6.5	5.01	5.48	4.69	6.37	4.94	5.67		5.9	7.54	6.28	6.87	6.89	7.68	6.78	8.22
				5.19	6.94			4.78	7.19	5.14	4.35		6.44	7.82			6.9	8.56	7.13	6.08
				5	7.1			4.6	6.47	4.08	4.79		6.39	8.36			6.1	8.36	5.83	7.38
				1 week				4 weeks
		Figure 2B	Cross-sectional area (μm2)	WT		Trpv4 KO		WT		Trpv4 KO
				Sham	TAC	Sham	TAC	Sham	TAC	Sham	TAC
				378.97	668.405	270.76	280.57	185.8	516.444	190.853	332.25
				311.69	670.68	296.575	268.92	190.188	709.018	179.332	256.731
				322.77	541.76	275.3	268.7	178.877	490.792	180.521	243.79
								185.873	480.754	188.965	292.228
								213.349	610.51	236.139	278.563
								200.269	413.302	120.986	258.689
								247.396	489.882	319.741	373.054
				1 week									1 week				4 weeks
				WT		Trpv4 KO		4 weeks				BNP(nppb) mRNA	WT		Trpv4 KO		WT		Trpv4 KO
		Figure 2C	ANP(nppa) mRNA	Sham	TAC	Sham	TAC	WT		Trpv4 KO			Sham	TAC	Sham	TAC	Sham	TAC	Sham	TAC
				0.503578	14.0439	0.916396	3.62264	Sham	TAC	Sham	TAC		1.15747	13.7044	1.08712	1.93256	1.15196	3.0026	0.585924	0.790641
				0.352892	5.11294	0.69836	0.859782	1.24435	8.95172	0.562161	1.02783		0.865719	8.91043	0.847045	0.876309	1.48297	2.83514	0.602347	1.01264
				1.78242	4.83102	1.81007	0.586435	1.16517	8.3318	0.765157	1.15423		0.645635	10.7979	1.16919	0.619644	0.365066	3.3469	0.705784	3.1134
				0.902663	7.39638	1.03243	2.02657	0.590472	10.2831	0.414262	2.33847		0.544885	13.5401	1.17732	1.77955	1.27225	2.51641	0.647676	1.16349
				1.39077	11.0935	0.446906	0.469775	1.12315	5.40212	0.628805	1.52252		1.36867	12.5507	0.801354	0.949021	1.11711	2.16591	0.490979	0.779102
				1.06768	12.1637	1.09584	0.543383	0.979631	5.94872	0.539337	1.42777		1.41762	9.61437	0.917965	0.668274	0.571179	2.2332	0.780994	2.29277
								1.07715	5.41515	0.548202	0.853846						1.03947	2.45976	0.940681	1.01874
								0.820076	6.56277	1.82475	1.21304
