# Supplementary material for: Activation of transient receptor potential vanilloid 4 is involved in pressure overload-induced cardiac hypertrophy
Source: eLife. 2022 Jun 22;11:e74519. doi: 10.7554/eLife.74519 (PMC9224988; doi:10.7554/eLife.74519)
Supplement: Figure 3—source data 1. [file elife-74519-fig3-data1.xlsx]

## Sheet: Figure 3
		Figure —Source Data 1
		Figure 3—Source Table 1
	Figure 3B	EF(%)	WT		Trpv4 KO			Figure 3C	FS(%)	WT		Trpv4 KO				Figure 3D	LV Mass (mg)	WT		Trpv4 KO
			Sham	TAC	Sham	TAC				Sham	TAC	Sham	TAC					Sham	TAC	Sham	TAC
			67.7336	49.9961	71.5152	78.3511				37.2147	24.8916	39.5582	45.5094					73.3651	153.537	63.5833	99.0524
			74.8914	36.6614	78.6077	75.2253				42.5372	17.483	45.6823	41.9255					63.4645	189.96	109.373	145.67
			66.3889	46.8932	76.0687	63.6672				35.6959	22.9251	43.4242	33.7374					94.7388	320.114	84.3324	121.208
			67.3876	67.0401	71.1718	68.6651				36.3088	35.8601	39.4076	37.5934					82.3514	139.391	96.5165	112.363
			66.0659	57.665	76.9069	79.2064				35.3652	29.6704	43.4563	46.2445					89.3666	112.53	96.3588	109.434
			70.2831	58.6989	67.6468	75.499				38.6589	30.3719	36.5516	43.0281					92.93	114.119	100.519	119.463
	Figure 3E	LVID;s (mm)	WT		Trpv4 KO			Figure 3G	Fibrosis area (%)	WT		Trpv4 KO				Figure 3H	Collagen-1(Col1a1) mRNA	WT		Trpv4 KO
			Sham	TAC	Sham	TAC				Sham	TAC	Sham	TAC					Sham	TAC	Sham	TAC
			2.11852	3.5037	1.88426	1.60926				0.767475	3.38645	0.567575	0.581676					1.24243	3.60671	0.503355	0.60018
			1.67639	3.81944	1.49537	1.42454				0.327995	3.21983	0.600512	0.454542					1.03676	6.71371	0.632003	1.12123
			2.25093	2.77037	1.8338	2.40833				0.616326	1.54465	0.27361	0.493113					0.72081	7.28598	1.1057	3.40721
			2.01482	1.94398	2.14907	2.31389				0.483131	1.79012	0.199972	0.501632					1.18581	3.56726	0.871834	1.47229
			2.29028	2.58935	1.44028	1.76296												1.24529	10.121	0.742265	1.15247
			2.01482	2.55	2.08565	1.81018												0.884799	8.87654	0.881731	1.33176
																		0.684102	7.17139	0.937999	0.822327
	Figure 3I	Collagen-3(Col3a1) mRNA	WT		Trpv4 KO			Figure 3J	Galectin-3 (LGALS3) mRNA	WT		Trpv4 KO
			Sham	TAC	Sham	TAC				Sham	TAC	Sham	TAC
			1.19547	2.14925	0.582903	0.514841				0.436537	2.29374	1.19269	0.68863
			0.93893	4.11486	0.374681	1.3934				0.877524	3.37547	0.689835	2.29389
			0.865602	2.95493	0.974618	2.15711				1.68594	3.94895	1.56395	1.49652
			1.33559	3.72946	0.829159	1.10591				0.917755	2.15316	1.88577	1.50039
			1.2836	4.69102	0.595128	0.887685				1.24534	4.36818	0.593497	0.706742
			0.679499	5.82919	0.693968	1.31769				1.00334	5.04803	0.988485	0.681136
			0.701302	3.18703	0.976051	0.861436				0.833571	3.85564	0.81424	0.739852
