# Supplementary material for: Activation of transient receptor potential vanilloid 4 is involved in pressure overload-induced cardiac hypertrophy
Source: eLife. 2022 Jun 22;11:e74519. doi: 10.7554/eLife.74519 (PMC9224988; doi:10.7554/eLife.74519)
Supplement: Figure 4—source data 1. [file elife-74519-fig4-data1.xlsx]

## Sheet: figure4-source data 1
Figure 4—Source Data 1
Figure 4—Table Data 1
		Figure 4B	IL-1β protein	WT		Trpv4 KO				Figure 4C	IL-6 protein	WT		Trpv4 KO				Figure 4D	TNF-α protein	WT		Trpv4 KO
				Sham	TAC	Sham	TAC					Sham	TAC	Sham	TAC					Sham	TAC	Sham	TAC
				0.799103	2.02004	0.704251	0.734914					1.23212	0.767877	0.773722	0.725125					1.02255	3.02199	0.920557	1.31309
				1.2009	1.64039	0.70309	0.647561					0.767877	1.90653	0.846005	0.817869					0.977448	2.6084	0.8973	1.51666
				0.970555	2.51113	1.06422	1.0039					0.992423	1.83635	1.04007	0.934263					1.24428	2.52586	0.770914	1.04796
				1.02944	1.64772	1.13393	1.18018					1.00758	2.39335	0.955786	1.35569					0.755722	1.95332	0.794988	1.06266
				1.01259	1.73922	1.68122	1.26419					1.07994	1.83877	0.907297	1.36772					1.0077	2.45456	1.00849	1.56272
				0.987408	1.99754	1.24234	1.26609					0.920061	1.84097	1.10636	1.0904					0.992302	2.4405	1.11806	1.66578
