# Supplementary material for: Activation of transient receptor potential vanilloid 4 is involved in pressure overload-induced cardiac hypertrophy
Source: eLife. 2022 Jun 22;11:e74519. doi: 10.7554/eLife.74519 (PMC9224988; doi:10.7554/eLife.74519)
Supplement: Figure 4—source data 2. [file elife-74519-fig4-data2.xlsx]

## Sheet: figure4-source data 2
	Figure 4—Source Data 2
	Figure 4—Table Data 1
	Figure 4E	IL-1β(Il1b) mRNA	WT		Trpv4 KO				Figure 4F	IL-6 (Il6) mRNA	WT		Trpv4 KO				Figure 4G	TNF-α（Tnfa) mRNA	WT		Trpv4 KO
			Sham	TAC	Sham	TAC					Sham	TAC	Sham	TAC					Sham	TAC	Sham	TAC
			0.693995	1.99211	2.57642	0.983256					1.07958	21.5471	0.950392	0.949368					1.11527	3.57965	0.913392	2.70528
			1.67812	9.71615	0.845879	0.605525					0.920421	18.661	0.561396	1.17235					1.38271	3.72081	1.61432	2.2436
			0.519805	8.52356	1.79685	0.767962					0.86248	3.51879	1.25211	1.42456					0.857064	3.75353	1.39666	0.540858
			1.10808	2.28466	0.546414	1.60709					1.60864	7.28335	1.98712	3.82665					0.644956	4.00889	1.93145	0.805404
			1.16733	7.01229	0.89063	1.55538					0.528882	12.5678	0.432412	3.1839					1.21994	3.51165	0.833149	0.616727
			1.00487	2.55084	2.34696	2.3874					0.273998	2.76802	0.603723	0.546605					0.878893	1.9036	0.788524	0.755431
			0.827801	3.87368	1.46354	1.82578					1.726	2.56185	0.623187	0.700023					0.901168	3.98888	0.487918	0.44369
	Figure 4H	MCP-1(Mcp1p) mRNA	WT		Trpv4 KO				Figure 4I	MIP-2(Mip2) mRNA	WT		Trpv4 KO
			Sham	TAC	Sham	TAC					Sham	TAC	Sham	TAC
			1.21817	6.03597	1.36081	1.42398					1.68549	10.1791	1.56625	1.94855
			1.35287	3.88893	2.15789	1.44885					0.679488	7.38579	3.69275	1.77905
			0.775602	3.46373	1.01724	0.414194					0.619441	4.72652	2.57327	0.578888
			0.653357	2.98204	0.790333	1.04857					1.01558	5.16409	1.08447	1.88465
			1.11845	1.91803	1.06282	1.29651					0.746993	2.06189	0.837991	1.56777
			0.915182	2.78498	1.09626	1.67622					0.897278	3.95868	0.994068	2.61862
			0.966367	1.64484	0.664733	0.756295					1.35573	3.63152	0.820796	1.68001
