# Supplementary material for: Activation of transient receptor potential vanilloid 4 is involved in pressure overload-induced cardiac hypertrophy
Source: eLife. 2022 Jun 22;11:e74519. doi: 10.7554/eLife.74519 (PMC9224988; doi:10.7554/eLife.74519)
Supplement: Figure 4—source data 3. [file elife-74519-fig4-data3.xlsx]

## Sheet: figure4-source data 3
	Figure 4—Source Data 3
	Figure 4—Table Data 1
	Figure 4K	ASC protein	WT		Trpv4 KO				Figure 4L	NLRP3 protein	WT		Trpv4 KO
			Sham	TAC	Sham	TAC					Sham	TAC	Sham	TAC
			1.14049	2.00526	1.15761	1.18207					0.820525	4.00478	1.54145	3.27015
			0.85951	2.21509	1.01302	1.26758					1.17948	3.52172	1.36924	2.38383
			0.859483	2.3219	1.05838	1.06323					1.25967	2.59637	0.831947	1.22298
			1.14052	2.04694	0.613498	1.19863					0.740327	1.64732	1.02963	1.23267
			1.23698	1.86576	0.959934	1.04522					0.94363	2.69133	0.987809	1.50148
			0.763017	1.82785	0.894768	1.34654					1.05637	3.3117	1.30739	1.84976
	Figure 4M	P20/Caspase-1 protein	WT		Trpv4 KO				Figure 4N	p-p65/p65 prptein	WT		Trpv4 KO
			Sham	TAC	Sham	TAC					Sham	TAC	Sham	TAC
			1.24548	4.63584	1.69368	1.73714					0.981877	1.85148	0.845821	0.833478
			0.754523	5.76951	1.03102	2.5959					1.01812	1.542	0.898894	1.11507
			0.861659	1.73709	0.796347	0.90942					1.01566	1.66582	0.872956	1.17281
			1.13834	2.10235	0.82758	1.17174					0.984342	1.38602	1.0915	1.31111
			0.89798	1.86996	1.27365	1.29665					0.927053	1.6705	0.802612	1.14786
			1.10202	2.62767	1.20263	1.38765					1.07295	1.7656	0.740276	0.789363
