# Supplementary material for: Activation of transient receptor potential vanilloid 4 is involved in pressure overload-induced cardiac hypertrophy
Source: eLife. 2022 Jun 22;11:e74519. doi: 10.7554/eLife.74519 (PMC9224988; doi:10.7554/eLife.74519)
Supplement: Figure 5—source data 1. [file elife-74519-fig5-data1.xlsx]

## Sheet: figure5-source data 1
	Figure 5—Source Data 1
	Figure 5—Source Table1
		Figure 5B	HW/BW (mg/g)	Vehical	GSK3874			Figure 5C	HW/TL (mg/mm)	Vehicle	GSK3874			Figure 5D	Cross-sectional area (μm2)	Vehical	GSK3874
				6.89189	4.83871					10.119	7.01754					454.191	379.697
				7.15185	6.90438					10.7637	9.70325					499.554	314.328
				7.16475	5.01288					10.4586	6.7907					466.677	328.062
				6.38554	6.05668					9.29825	8.21076					513.644	323.603
				6.35472	5.26877					9.42889	7.61714
				6.28968	5.99573					9.0262	7.70879
		Figure 5E	ANP(Nppa) mRNA	Vehicle	GSK3874			Figure 5F	BNP(Nppb) mRNA	Vehicle	GSK3874			Figure 5G	EF (%)	Vehicle	GSK3874			Figure5H	FS (%)	Vehicle	GSK3874
				1.40424	0.18709					1.35985	0.211945					56.4477	71.6355					28.8156	39.92
				0.642729	0.263291					0.559508	0.48744					48.9959	79.6522					24.1948	46.6735
				1.38706	0.110532					1.31408	0.262172					55.1911	74.333					28.1295	41.9672
				0.562711	0.191486					0.568067	0.183339					59.6161	70.4904					30.5614	39.3302
				1.44721	0.281716					1.63328	0.335827					57.745	76.2975					29.6465	43.8684
				0.556049	0.131766					0.565216	0.24203					50.6875	75.9661					25.2228	43.3114
		Figure 5I	LV mass (mg)	Vehicle	GSK3874			Figure 5J	LVID,S (mm)	Vehicle	GSK3874			Figure 5k	fibrotic area (%)	Vehical	GSK3874
				184.194	116.972					2.50278	2.3375					4.0222	0.869853
				155.576	85.1425					2.61296	1.51111					2.35783	0.365804
				123.238	78.5623					2.74676	1.94398					2.51822	0.278623
				107.376	131.666					2.50278	2.51852
				107.909	101.86					2.54213	1.8338
				119.373	72.9598					2.66018	1.87315
