# Supplementary material for: Activation of transient receptor potential vanilloid 4 is involved in pressure overload-induced cardiac hypertrophy
Source: eLife. 2022 Jun 22;11:e74519. doi: 10.7554/eLife.74519 (PMC9224988; doi:10.7554/eLife.74519)
Supplement: Figure 6—source data 1. [file elife-74519-fig6-data1.xlsx]

## Sheet: Figure 6-source data 1
	Figure6—Source Data 1
	Figure 6—data table 1
	Figure 6B	Surface area (μm2)	DMSO	AngII	AngII+GSK3874			Figure 6C	ANP(Nppa) mRNA	DMSO	AngII	AngII+GSK3874
			5248.2	10017.9	10017.9					0.827952	2.90785	1.86699
			3966.5	8384.1	5698.3					0.951443	8.18914	1.98381
			6774.1	17670.7	4476					1.2206	8.1478	1.26842
			3698.4	17946.4	5936					0.983766	5.49701	1.91323
			5262.2	9068.9	5698.3					0.954975	7.14057	1.55062
			4209.3	8284	6217.4					1.06126	2.83995	2.19518
			7232.3	22407.2	5963
			6036.1	22220.9	3708.4
			4731.1	12841	4536.3
			5027.5	17285.9	3459.5
			5116.7	18378.1	3940.5
			5075	21226.3	6400.6			Figure 6D	BNP(Nppb) mRNA	DMSO	AngII	AngII+GSK3874
			3222.3	8976.1	9989.3					0.731705	2.21003	1.45156
			2918.9	10076	9466.3					1.08778	9.57342	1.87118
			6201.4	17850.2	7656.8					1.18052	10.4183	1.42548
			3807.6	20072.3	6255.8					0.761106	6.04308	1.15214
			3493.5	8044.9	3610.4					0.852388	4.09421	1.29242
			3510.6	12667.3	3930.6					1.38651	2.24876	1.14467
			6063.1	13971.4	7516.8
			5130.5	14987.7	4297.4
	Figure 6F	Surface area (μm2)	DMSO	PE	PE+GSK3874			Figure 6G	ANP(Nppa) mRNA	DMSO	PE	PE+GSK3874
			5639.2	24784	10830.5					0.699013	1.60916	1.62173
			3221.9	14566.1	15013.4					1.41826	2.18128	1.84023
			7281.2	14208.5	14279.7					0.341354	1.87027	1.54261
			4702.4	14099.9	12581.1					0.96356	2.43674	0.384808
			5058	22832.7	6814.9					0.986412	2.58725	1.72256
			5363.4	20275.1	8744.1					1.5914	2.3773	1.0123
			5286.7	15771.9	11174.5
			3747.6	18977.8	10745.2
			4193.6	17779.6	12427.3			Figure 6H	BNP(Nppb) mRNA	DMSO	PE	PE+GSK3874
			5100.5	21891.2	9747.7					0.827234	5.74892	0.962251
			5859.5	28184.6	11414.5					1.29851	1.82825	0.976058
			9425.5	20095	14454.5					0.481522	2.46509	0.992891
			6994.5	15611.8	12082.9					1.1015	3.65173	0.406017
			5978.6	13896	10120.8					1.0331	3.14883	1.46478
			8639.9	26985	11238.5					1.25813	8.72103	0.732677
			5224.1	26640.5	7275.4
			5402.7	20523.6	7340.5
			6696.6	18331.3	7119.5
			7368	18649.4	9068.9
			5494.7	25394.7	6482.1
