# Supplementary material for: Activation of transient receptor potential vanilloid 4 is involved in pressure overload-induced cardiac hypertrophy
Source: eLife. 2022 Jun 22;11:e74519. doi: 10.7554/eLife.74519 (PMC9224988; doi:10.7554/eLife.74519)
Supplement: Figure 7—source data 1. [file elife-74519-fig7-data1.xlsx]

## Sheet: figure7-source data 1
Figure 7—Source Data 1
Figure 7—data table 1
Figure 7B	TRPV4 Protein	DMSO	AngII	AngII+GSK3874
		0.39805	2.24064	0.75963
		1.60195	2.11182	0.37497
		0.820377	2.58452	0.847051
		1.17962	2.4414	0.659941
		0.65155	2.59717	0.446729
		1.34845	1.41272	1.57971
