# Supplementary material for: Activation of transient receptor potential vanilloid 4 is involved in pressure overload-induced cardiac hypertrophy
Source: eLife. 2022 Jun 22;11:e74519. doi: 10.7554/eLife.74519 (PMC9224988; doi:10.7554/eLife.74519)
Supplement: Figure 7—source data 2. [file elife-74519-fig7-data2.xlsx]

## Sheet: Figure 7C
	Figure 7—Source Data 1
	Figure 7—data table 1
	Figure 7C	Trpv4 mRNA	DMSO	AngII	AngII+GSK3874
			1.71099	3.60991	1.09012
			0.589404	7.5783	1.93549
			0.699608	5.27254	0.700294
			0.977274	2.70714	0.778649
			0.875733	3.16938	0.756292
			1.14699	2.17125	1.28491

## Sheet: Figure 7D
	Figure 7—Source Data 1
	Figure 7—data table 2
	Figure 7D	Calcium F/F0	Time (s)	DMSO										AngII										AngII+GSK3874
			0	1.01762	0.980611	0.986089	1.00985	0.987943	0.962774	1.01038	0.993122	1.01092		1.04462	1.02158	0.984053	0.99344	0.99344	1.01725	0.935642	1.0066	0.983721		0.997704	0.989051	0.990922	1.01136	0.967408	0.984653	0.973027	0.973278	1.00056
			3	0.974807	0.991797	0.961437	0.999695	0.95985	0.991876	1.00828	0.982118	0.981008		0.993868	0.975004	1.01676	0.972352	0.972352	1.01504	0.97793	0.973597	0.997674		0.922563	1.00365	0.990922	1.01818	1.01117	0.996809	0.94782	1.04042	1.00337
			6	1.02091	0.961969	0.979046	1.03424	0.994967	1.01613	0.970548	1.00963	1.03784		0.968492	1.04642	0.994957	1.00984	1.00984	1.01504	1.03344	0.985384	1.00698		0.997704	0.937956	1.0128	0.993182	1.00426	1.01808	1.02849	0.987454	0.975267
			9	0.951754	1.02163	1.0037	0.977344	0.992626	0.962774	0.974741	1.01788	1.01092		0.951575	1.01537	0.989505	1.00047	1.00047	0.990712	1.02815	0.978312	1.01628		1.03527	0.989051	0.999672	1.02955	1.01117	1.01504	0.94782	0.974022	1.03148
			12	0.994566	1.00671	1.0037	1.03017	1.0137	1.03068	0.989414	0.973865	0.975026		1.01079	0.99674	1.02767	1.0239	1.0239	0.964175	1.007	0.992456	0.981395		1.0478	0.989051	1.00405	0.988636	1.02269	1.04239	1.04865	1.02088	1.00337
			15	1.03079	1.00671	0.96848	1.00579	1.00667	0.991876	1.0502	1.03164	1.00493		0.98118	1.01226	0.978602	0.99344	0.99344	0.992923	1.01229	0.978312	0.990698		0.989355	1.0146	1.01498	1.00227	0.983531	1.06063	1.06882	0.958358	0.980888
			18	1.03408	0.995526	0.996654	1.00782	0.983261	0.982175	1.02715	1.01788	0.98699		1.01501	0.981214	0.989505	1.01453	1.01453	1.02831	1.00436	1.03489	0.993023		1.00605	0.981752	1.00405	0.981818	0.985834	1.03024	1.02849	0.957743	0.983699
			21	1.00445	1.044	0.979046	1.02814	1.0137	1.03553	0.995703	1.00413	1.01989		1.03616	0.999845	0.986779	1.00515	1.00515	1.01725	1.02551	1.02075	0.993023		0.99353	0.963504	0.97561	0.995455	0.958194	1.05455	0.94782	0.984614	0.983699
			24	0.984686	1.08501	1.02835	0.995631	1.00433	1.0137	1.00828	1.00688	1.01391		1.02347	0.987424	1.00314	1.00984	1.00984	1.00398	0.967358	1.01603	0.997674		1.00188	1.0146	0.973422	0.988636	0.997351	1.00593	0.998235	1.01484	0.983699
			27	0.971513	1.00298	1.06357	0.991568	1.01604	1.01128	0.96426	0.965612	1.00194		0.985409	0.971899	0.992231	0.977038	0.977038	0.988501	0.999075	0.97124	0.988372		0.997704	0.934307	0.993109	1.03182	0.999654	1.02416	0.983111	1.03819	1.02586
			30	1.05384	0.95824	1.03539	0.995631	1.05818	1.01128	0.989414	1.02063	1.00493		0.964263	0.99674	1.03039	0.988754	0.988754	1.01946	0.97793	1.01839	0.967442		0.981006	1.02555	1.04561	1	1.00196	1.00289	1.00832	0.965985	0.997752
			33	1.03079	1.01417	0.922698	0.987504	0.987943	0.999151	1.02086	0.995873	1.0169		1.02347	0.99674	0.981328	1.02858	1.02858	0.999558	0.964715	1.01131	0.997674		0.99353	0.974453	1.00405	0.956818	1.04112	0.978575	1.03353	0.987228	1.01462
			36	1.04726	0.995526	0.950872	0.979376	0.985602	0.962774	0.981029	1.01238	0.981008		0.972722	1.01537	1.00859	0.99344	0.99344	0.995135	1.007	0.997171	0.969767		0.968483	1.01825	0.96686	0.990909	1.05033	0.963379	0.973027	0.995683	1.00337
			39	0.994566	0.954512	0.964959	0.999695	0.997308	0.987026	1.01247	1.02614	0.975026		1.03193	0.993635	1.00314	0.99344	0.99344	0.981866	0.991146	1.00896	1.02326		0.989355	1.01095	0.999672	1.00682	1.04342	0.96034	1.05369	1.00925	0.99213
			42	0.96822	0.976883	1.06357	1.02611	0.973897	1.00158	0.997799	0.984869	1.00194		1.02347	1.00605	0.967698	1.00515	1.00515	0.979655	0.991146	1.01131	0.983721		1.0311	1.02555	1.00842	1.01591	0.967408	0.999848	1.02344	1.0291	1.0118
			45	0.964927	0.943326	1.01778	0.999695	0.985602	1.004	0.983125	0.993122	1.01391		1.0277	1.01537	1.00041	0.998126	0.998126	0.992923	1.00436	1.01839	1.00465		1.0144	1.0219	0.993109	0.965909	0.997351	0.966418	0.942778	1.00665	1.02305
			48	1.01433	1.0701	1.0037	0.999695	0.978579	0.999151	1.02086	0.990371	0.998953		0.993868	1.00916	1.03312	1.02624	1.02624	0.986289	1.01229	1.00896	1.04419		0.997704	1.0146	0.995297	1.00455	1.00196	0.948184	1.03857	0.998289	1.01743
			51	0.98798	1.0179	1.01778	0.963121	1.00901	1.00885	0.999895	0.954608	0.963063		0.930429	0.962583	0.992231	1.00515	1.00515	0.999558	1.02551	0.987742	1.0093		0.972657	1.00365	1.0128	1.00455	0.992744	0.969458	1.01336	1.0299	0.983699
			54	1.00115	1.00298	1.02835	0.963121	1.04881	1.00158	1.01038	1.00963	1.01092		0.998097	1.00605	0.997683	0.977038	0.977038	1.01061	1.02286	0.985384	1.03023		1.02275	1.0073	0.999672	1.025	0.962801	1.00896	0.978069	1.01207	0.986509
			57	0.951754	0.969426	1.02483	1.00579	1.00199	1.02583	0.985222	1.00963	0.989981		1.02347	0.990529	1.02222	0.984067	0.984067	1.00177	1.01229	0.994814	1.02093		1.03945	1.01095	1.01498	0.988636	0.999654	0.969458	0.962944	1.02301	0.997752
			73	1.13618	1.17077	1.1657	1.21508	1.27122	1.25621	1.22629	1.30124	1.45357		1.26454	1.1551	1.83999	1.55108	1.55108	1.59443	1.4854	1.32249	1.28372		1.23565	1.09124	1.38685	1.31136	1.28757	1.26425	1.12932	1.43258	1.36875
			74.6	1.10654	1.1745	1.18331	1.19679	1.26888	1.23439	1.24306	1.20495	1.43562		1.29837	1.10542	1.80455	1.55342	1.55342	1.56789	1.44575	1.28477	1.33023		1.23565	1.14599	1.41529	1.28182	1.26224	1.27336	1.18982	1.52414	1.38842
			76.2	1.11971	1.18941	1.16922	1.17647	1.25249	1.27319	1.23677	1.1912	1.45357		1.20956	1.11163	1.80183	1.53702	1.53702	1.56126	1.51447	1.28006	1.32326		1.14381	1.09124	1.3606	1.32045	1.24381	1.25513	1.16461	1.53014	1.3828
			77.9	1.11642	1.18195	1.09526	1.1846	1.26888	1.28047	1.20323	1.22971	1.38179		1.21379	1.17994	1.84272	1.52999	1.52999	1.53472	1.45104	1.32249	1.34651		1.20225	1.18613	1.39998	1.3	1.29218	1.24905	1.13436	1.45976	1.38842
			79.5	1.11312	1.2006	1.21852	1.16225	1.25717	1.23924	1.20323	1.14718	1.35786		1.25185	1.14579	1.79092	1.55811	1.55811	1.54135	1.48804	1.31542	1.35349		1.13964	1.05475	1.39998	1.30682	1.27375	1.24905	1.20998	1.62256	1.39966
			81.2	1.10324	1.12975	1.18331	1.18053	1.29229	1.27076	1.24096	1.15543	1.38179		1.22225	1.12405	1.77184	1.56514	1.56514	1.56347	1.48275	1.34371	1.30465		1.16886	1.13139	1.34529	1.27273	1.26684	1.18827	1.12427	1.56316	1.33783
			82.8	1.08019	1.1745	1.15161	1.20289	1.25717	1.25864	1.26192	1.21871	1.36384		1.15458	1.13958	1.74458	1.52765	1.52765	1.61654	1.40082	1.30363	1.33023		1.13129	1.16423	1.36279	1.275	1.30139	1.21562	1.16461	1.5024	1.30973
			84.5	1.03738	1.13721	1.11991	1.17241	1.31336	1.25621	1.24096	1.17744	1.36982		1.21802	1.18615	1.69824	1.57451	1.57451	1.59664	1.42196	1.33192	1.25116		1.20643	1.08759	1.3781	1.26818	1.28988	1.25513	1.17469	1.54333	1.32378
			86.1	1.05714	1.11484	1.14457	1.1785	1.27356	1.28047	1.20742	1.21045	1.32496		1.20533	1.18615	1.70097	1.50656	1.50656	1.57674	1.41139	1.30599	1.30465		1.11876	1.06569	1.36935	1.27045	1.27375	1.22778	1.15957	1.49211	1.32097
			87.8	1.06702	1.15213	1.20092	1.18257	1.29463	1.31199	1.15711	1.16919	1.3429		1.23493	1.18615	1.641	1.53468	1.53468	1.53472	1.4061	1.29656	1.36279		1.15216	1.0365	1.39123	1.32955	1.31061	1.23385	1.13436	1.50226	1.3294
			90	1.01762	1.18941	1.18683	1.17444	1.27122	1.27076	1.24725	1.18569	1.39076		1.28146	1.1551	1.64918	1.53468	1.53468	1.57452	1.41932	1.29656	1.33256		1.15216	1.08394	1.31904	1.3	1.25072	1.26728	1.14948	1.48833	1.31816
			93	1.06373	1.13348	1.13752	1.17037	1.28058	1.28047	1.20742	1.13342	1.3459		1.29414	1.14268	1.65735	1.54171	1.54171	1.58116	1.41139	1.3272	1.32326		1.21895	1.13504	1.34748	1.28864	1.25072	1.26121	1.10915	1.55697	1.31535
			96	1.08019	1.11857	1.12696	1.2232	1.21971	1.27076	1.24096	1.17469	1.37879		1.23916	1.19236	1.63827	1.58857	1.58857	1.54799	1.40346	1.31542	1.34186		1.18138	1.04015	1.31685	1.27045	1.28527	1.22474	0.998235	1.48111	1.31535
			99	1.06373	1.11111	1.11991	1.15412	1.2759	1.28774	1.19065	1.11417	1.37879		1.21379	1.16752	1.67643	1.54171	1.54171	1.59885	1.40346	1.33428	1.33256		1.15633	1.02555	1.30154	1.28182	1.28066	1.21866	1.04865	1.59131	1.30973
			102	1.0736	1.10738	1.18331	1.20695	1.25015	1.27319	1.2179	1.13342	1.38478		1.22647	1.16441	1.67371	1.54639	1.54639	1.50376	1.37967	1.29892	1.33721		1.10624	1.00365	1.29279	1.26136	1.27606	1.2217	1.01336	1.53991	1.30129
			105	1.05055	1.06637	1.14105	1.18663	1.23844	1.27804	1.20742	1.09491	1.36085		1.21379	1.18615	1.6519	1.47844	1.47844	1.49934	1.3876	1.30835	1.30465		1.14381	1.0438	1.33654	1.26364	1.26224	1.26121	1.04361	1.53354	1.35188
			108	1.02421	1.11484	1.12696	1.12974	1.27824	1.29502	1.19694	1.13067	1.41768		1.17149	1.12405	1.64372	1.47376	1.47376	1.50376	1.34267	1.25884	1.32791		1.10207	1.14234	1.32342	1.27727	1.22769	1.28856	0.998235	1.51923	1.36312
			111	1.08678	1.10738	1.14105	1.11348	1.22908	1.27076	1.19484	1.13067	1.31898		1.17995	1.12715	1.61101	1.46673	1.46673	1.46617	1.36117	1.30599	1.2907		1.13129	1.12774	1.31248	1.25455	1.28066	1.20954	1.07386	1.49481	1.31535
			114	1.04726	1.18195	1.12696	1.15412	1.21971	1.30957	1.18646	1.15543	1.3429		1.23916	1.1551	1.66553	1.50422	1.50422	1.46617	1.4061	1.27063	1.27442		1.18973	1.08029	1.29498	1.27045	1.24151	1.2217	1.07386	1.4819	1.30691
			117	1.09995	1.1223	1.1657	1.13177	1.23376	1.30957	1.17598	1.14168	1.36085		1.21802	1.14889	1.64372	1.45736	1.45736	1.46617	1.36382	1.22112	1.30465		1.14799	1.04744	1.31685	1.28182	1.25302	1.23689	1.08394	1.49491	1.31816
			120	1.1263	1.1484	1.12344	1.11958	1.26185	1.32412	1.19484	1.15818	1.33393		1.16304	1.18305	1.59466	1.49016	1.49016	1.48165	1.32681	1.23527	1.28837		1.08119	1.04744	1.29279	1.28182	1.28297	1.21866	1.07386	1.43546	1.33502
			123	1.02421	1.13721	1.16922	1.1399	1.23376	1.33139	1.18646	1.1912	1.33393		1.15035	1.2172	1.60011	1.49016	1.49016	1.4529	1.31624	1.29892	1.30698		1.09789	1.07299	1.29935	1.27727	1.24611	1.23689	1.09403	1.38408	1.3294
			126	1.04067	1.09247	1.16218	1.16022	1.25249	1.30957	1.19904	1.16644	1.40272		1.19264	1.0961	1.64918	1.43158	1.43158	1.47722	1.30567	1.24941	1.26977		1.11041	1.11679	1.29717	1.24545	1.21617	1.23082	1.00328	1.41346	1.28162
			129	1.06702	1.12603	1.12696	1.1277	1.2361	1.28532	1.16969	1.13067	1.34889		1.14612	1.16131	1.60284	1.43627	1.43627	1.50818	1.35324	1.23055	1.23488		1.08537	1.05839	1.28404	1.24773	1.19544	1.23689	1.04361	1.44107	1.26195
			132	1.08019	1.1223	1.12344	1.09926	1.2361	1.31199	1.19904	1.09491	1.3758		1.11229	1.12715	1.62464	1.43861	1.43861	1.47943	1.32946	1.22819	1.26512		1.09789	1.10949	1.33217	1.23182	1.20235	1.17307	1.0789	1.51084	1.32378
			135	1.05384	1.13348	1.17979	1.16428	1.1846	1.32412	1.16969	1.13067	1.29804		1.19264	1.12405	1.58375	1.47844	1.47844	1.42415	1.30567	1.23998	1.23023		1.15216	1.0365	1.27748	1.20455	1.21617	1.19739	1.10411	1.44107	1.29848
			138	1.07031	1.15958	1.14105	1.11755	1.2361	1.30714	1.20113	1.15268	1.31599		1.16727	1.13958	1.57285	1.50656	1.50656	1.47501	1.34003	1.25177	1.24884		1.13129	1.08029	1.2906	1.225	1.22078	1.17915	1.05873	1.39439	1.28162
			141	1.10654	1.12603	1.11639	1.13177	1.22674	1.27561	1.1634	1.13067	1.33692		1.27723	1.05574	1.60011	1.43158	1.43158	1.44626	1.32681	1.22112	1.22326		1.08119	1.08394	1.29498	1.28182	1.2346	1.19435	1.05369	1.43863	1.31535
			144	1.03079	1.11857	1.09526	1.17037	1.25015	1.31927	1.1655	1.09766	1.33991		1.19264	1.11784	1.58375	1.46907	1.46907	1.46838	1.32681	1.25648	1.27907		1.18138	1.07299	1.28623	1.22727	1.21617	1.20954	1.10915	1.48945	1.27881
			147	1.09666	1.13721	1.12344	1.17241	1.26653	1.31199	1.16759	1.04264	1.33393		1.28991	1.13336	1.56467	1.40815	1.40815	1.43299	1.26602	1.22348	1.23023		1.10207	1.12409	1.31467	1.13409	1.19774	1.20347	1.06378	1.52037	1.27038
			150	1.09007	1.13348	1.12696	1.14396	1.21737	1.28289	1.16759	1.09491	1.29804		1.2011	1.11784	1.51288	1.36364	1.36364	1.41309	1.28981	1.23055	1.23023		1.17721	1.09489	1.28623	1.12273	1.21617	1.2065	1.06378	1.46292	1.2507
			153	1.02091	1.10365	1.11991	1.11551	1.22439	1.30229	1.1613	1.09766	1.25617		1.18841	1.152	1.53469	1.39644	1.39644	1.41973	1.2951	1.26827	1.25349		1.08537	1.0292	1.30592	1.13409	1.18162	1.21562	0.983111	1.44667	1.23946
			156	1.08348	1.19314	1.07061	1.11348	1.21737	1.24651	1.1634	1.0729	1.32197		1.14612	1.12094	1.48835	1.43158	1.43158	1.38877	1.2766	1.28241	1.21395		1.08954	1.05475	1.27748	1.18864	1.22308	1.18523	1.10915	1.47491	1.27038
			159	1.06373	1.03654	1.12696	1.14193	1.22439	1.24651	1.15292	1.11692	1.35487		1.25185	1.13336	1.45018	1.40581	1.40581	1.3954	1.29245	1.25412	1.2186		1.07285	1.12774	1.27529	1.10909	1.22769	1.19131	1.08898	1.46129	1.26757
			162	1.00445	1.10738	1.14105	1.12974	1.22439	1.26349	1.18856	1.0619	1.31299		1.23916	1.13958	1.4938	1.39644	1.39644	1.40867	1.30567	1.25177	1.25581		1.05615	1.10219	1.28185	1.16364	1.21156	1.20347	1.05873	1.53701	1.29567
			165	1.06373	1.11111	1.10583	1.1399	1.25717	1.25621	1.14663	1.08666	1.33393		1.21802	1.10852	1.4829	1.39175	1.39175	1.39982	1.23695	1.22348	1.23721		1.16886	1.12044	1.3081	1.15	1.22538	1.167	1.10411	1.51215	1.24789
			168	1.03408	1.11111	1.15865	1.15615	1.24781	1.22469	1.20532	1.09216	1.29804		1.26454	1.14268	1.46927	1.39878	1.39878	1.36665	1.28452	1.21877	1.26512		1.11459	1.09854	1.32342	1.10227	1.19314	1.17003	1.09907	1.46155	1.2226
			171	1.09995	1.08874	1.11287	1.11755	1.22674	1.24894	1.14663	1.09766	1.28309		1.26031	1.11163	1.4938	1.41753	1.41753	1.35559	1.28188	1.2447	1.22093		1.08954	0.992701	1.31248	1.14318	1.1678	1.19739	1.07386	1.45422	1.21979
			174	1.07031	1.13721	1.15161	1.13177	1.22205	1.25864	1.13824	1.11417	1.27112		1.29837	1.17063	1.40112	1.35426	1.35426	1.34454	1.26074	1.21641	1.18837		1.09372	1.05475	1.28185	1.14318	1.19083	1.17915	1.06378	1.43764	1.2226
			177	1.01433	1.11857	1.12344	1.10535	1.19396	1.24409	1.15711	1.09766	1.27112		1.26877	1.06505	1.47744	1.34958	1.34958	1.33569	1.26867	1.21641	1.22558		1.09789	1.04015	1.26654	1.13182	1.22999	1.167	1.0789	1.47938	1.18887
			180	1.07031	1.11857	1.09174	1.10129	1.22908	1.25864	1.16759	1.08116	1.25916		1.21802	1.07126	1.44473	1.38707	1.38707	1.37992	1.27924	1.24941	1.19535		1.08537	1.09854	1.23592	1.16136	1.25072	1.12445	1.03857	1.47642	1.22541
			183	1.10983	1.09993	1.12696	1.11958	1.19162	1.23681	1.16969	1.08941	1.2801		1.27723	1.12715	1.41747	1.38004	1.38004	1.34896	1.26074	1.17869	1.20465		1.14381	1.07664	1.24686	1.13182	1.22078	1.15788	1.09907	1.49312	1.22822
			186	1.02421	1.1484	1.15865	1.12974	1.21503	1.23439	1.17388	1.03164	1.27411		1.273	1.12094	1.45018	1.32849	1.32849	1.36223	1.26602	1.19991	1.2093		1.0645	1.06569	1.27748	1.13636	1.18162	1.17611	1.08898	1.5928	1.25913
			189	1.09995	1.10365	1.13048	1.07081	1.21035	1.25621	1.17598	1.02889	1.31898		1.24339	1.07126	1.40384	1.34724	1.34724	1.38213	1.22638	1.21169	1.2093		1.13964	1.04744	1.27748	1.1	1.18162	1.16396	1.01336	1.57559	1.22541
			192	1.05384	1.11111	1.11991	1.11755	1.22674	1.24894	1.12986	1.08116	1.22327		1.33221	1.08989	1.45291	1.36129	1.36129	1.3379	1.23695	1.24705	1.21163		1.10207	1.02555	1.28623	1.125	1.18392	1.14876	1.0789	1.51729	1.20573
			195	1.06043	1.1484	1.13048	1.11755	1.20098	1.23924	1.11728	1.10041	1.26215		1.25185	1.10852	1.41747	1.36129	1.36129	1.37107	1.24752	1.21641	1.20465		1.11459	1.06934	1.27311	1.13864	1.21617	1.18827	1.0789	1.47317	1.1692
			198	1.06043	1.13348	1.10935	1.17037	1.16821	1.25621	1.18017	1.08941	1.28309		1.24762	1.13958	1.43383	1.33318	1.33318	1.32906	1.26074	1.23055	1.23256		1.12294	1.11314	1.24248	1.16364	1.21387	1.1518	1.08898	1.52608	1.20011
			201	1.05714	1.18195	1.12696	1.08707	1.1963	1.23196	1.12776	1.05364	1.27411		1.18841	1.19236	1.42838	1.33786	1.33786	1.3379	1.23695	1.20934	1.20698		1.12294	1.10219	1.25779	1.175	1.18162	1.13661	1.05369	1.54643	1.21416
			204	1.05384	1.16331	1.14457	1.09926	1.25015	1.20044	1.14453	1.06465	1.27411		1.21379	1.16752	1.41747	1.31209	1.31209	1.31579	1.21581	1.22819	1.2093		1.14381	1.05839	1.22936	1.15	1.18623	1.18827	0.942778	1.52266	1.20011
			207	1.0275	1.17077	1.15161	1.10739	1.25249	1.22469	1.1634	1.0619	1.24421		1.19264	1.09921	1.37931	1.30037	1.30037	1.36223	1.23431	1.23291	1.19767		1.09372	1.05109	1.23373	1.11136	1.22999	1.17915	1.08394	1.53441	1.18325
			210	1.10654	1.02535	1.09878	1.11755	1.21737	1.21499	1.13615	1.0619	1.22626		1.28568	1.09921	1.37931	1.34958	1.34958	1.37771	1.20259	1.21169	1.20698		1.11459	1.08759	1.25779	1.11818	1.23229	1.14572	1.16461	1.53441	1.15795
			213	1.07031	1.13348	1.10583	1.11551	1.18225	1.20044	1.10471	1.0674	1.26813		1.28146	1.13026	1.41475	1.32381	1.32381	1.33127	1.21316	1.16926	1.1907		1.12294	1.13869	1.26873	1.14091	1.1701	1.17915	1.05873	1.5265	1.17763
			216	1.09995	1.13348	1.134	1.12364	1.22674	1.22226	1.11519	1.0674	1.23523		1.28991	1.17373	1.40112	1.30975	1.30975	1.32906	1.24752	1.20698	1.20233		1.13129	1.12774	1.23154	1.15909	1.19314	1.17915	1.13436	1.52909	1.18325
			219	1.08019	1.15958	1.14105	1.10739	1.19864	1.19801	1.13615	1.0674	1.23523		1.273	1.11784	1.37931	1.33318	1.33318	1.31137	1.22902	1.23762	1.23256		1.17303	1.10219	1.22717	1.18636	1.17471	1.1518	1.09907	1.5472	1.16358
			222	1.03738	1.18195	1.13048	1.13583	1.17055	1.15678	1.15921	1.0564	1.25318		1.24762	1.05884	1.36295	1.32849	1.32849	1.30473	1.23166	1.1834	1.16279		1.09372	1.05839	1.26873	1.12727	1.20005	1.11533	1.06378	1.55024	1.21135
			225	1.03738	1.16331	1.11639	1.10739	1.1846	1.18589	1.15921	1.07015	1.22327		1.3026	1.08679	1.36023	1.32615	1.32615	1.30473	1.21845	1.16926	1.19302		1.16468	1.0292	1.25779	1.17045	1.19314	1.12749	1.06882	1.53032	1.20011
			228	1.05055	1.1484	1.053	1.10129	1.24078	1.16648	1.15292	1.05364	1.20832		1.26454	1.12405	1.37931	1.36364	1.36364	1.31579	1.24224	1.19755	1.1907		1.07285	1.07664	1.26873	1.11136	1.18392	1.1518	1.10411	1.52284	1.17763
			231	1.04397	1.10738	1.06709	1.11551	1.20801	1.19801	1.1613	1.0674	1.22028		1.28991	1.06195	1.37658	1.29335	1.29335	1.31137	1.21845	1.19519	1.25814		1.05197	1.10219	1.23154	1.14545	1.20465	1.16396	1.08898	1.56531	1.18044
			234	1.06043	1.09993	1.10935	1.11551	1.19396	1.18104	1.12148	1.0729	1.21729		1.28568	1.18926	1.34933	1.36129	1.36129	1.318	1.18145	1.20226	1.19767		1.08537	1.04744	1.24467	1.14318	1.1678	1.13964	1.04361	1.56243	1.16639
			237	1.06043	1.13348	1.10583	1.07488	1.21035	1.19559	1.14663	1.06465	1.24121		1.24762	1.0961	1.39021	1.33318	1.33318	1.29589	1.19995	1.17397	1.19767		1.10624	1.08394	1.24467	1.15	1.20235	1.14876	1.04865	1.53304	1.14952
			240	1.02421	1.06264	1.15513	1.10942	1.19864	1.21256	1.13824	1.04539	1.25617		1.27723	1.08679	1.35478	1.32381	1.32381	1.30473	1.17616	1.22819	1.17209		1.13546	1.08394	1.22498	1.13182	1.19083	1.12445	1.02344	1.59826	1.15514
			243	1.05384	1.08874	1.04948	1.13177	1.22674	1.19316	1.14453	1.01788	1.20832		1.31106	1.06816	1.3357	1.30506	1.30506	1.27377	1.18938	1.19991	1.20233		1.10207	1.09489	1.24904	1.16136	1.18392	1.15788	1.06378	1.65774	1.16076
			246	1.04397	1.1745	1.06005	1.1338	1.21737	1.23439	1.15921	1.04539	1.20532		1.21802	1.10231	1.3357	1.31678	1.31678	1.34675	1.20788	1.21405	1.20465		1.14381	1.10949	1.23154	1.12727	1.19314	1.17307	1.09907	1.52429	1.16639
			249	1.08019	1.11857	1.16922	1.11145	1.21269	1.21014	1.15921	1.05089	1.22327		1.30683	1.13336	1.34387	1.291	1.291	1.32906	1.18938	1.20698	1.21628		1.13964	1.05109	1.25123	1.14773	1.2392	1.16092	1.06378	1.54522	1.15795
			252	1.06373	1.11111	1.13048	1.10739	1.21269	1.18104	1.15501	1.02063	1.20532		1.2011	1.08058	1.40112	1.29335	1.29335	1.28704	1.16559	1.16219	1.19767		1.14381	1.10949	1.21623	1.14318	1.19544	1.17611	1.1394	1.55856	1.19449
			255	1.02091	1.1745	1.0847	1.10535	1.19162	1.20286	1.14873	1.02338	1.23224		1.21802	1.18615	1.36295	1.30975	1.30975	1.24724	1.15766	1.20226	1.21628		1.11459	1.07299	1.22061	1.15909	1.22999	1.1518	1.06882	1.56517	1.18887
			258	1.08348	1.15213	1.053	1.09519	1.13543	1.21014	1.14453	1.0619	1.2143		1.31106	1.04332	1.34387	1.33552	1.33552	1.24945	1.17616	1.22584	1.2		1.01023	1.10949	1.26654	1.16364	1.17241	1.16092	1.04865	1.54221	1.17763
			261	1.08678	1.1484	1.09526	1.06675	1.22674	1.22226	1.13824	1.03164	1.19336		1.22225	1.034	1.34387	1.30272	1.30272	1.25608	1.19995	1.19283	1.20465		1.07702	1.11679	1.25561	1.19091	1.1701	1.14572	1.15957	1.57139	1.1973
			264	1.04726	1.0962	1.09174	1.11958	1.22205	1.21984	1.14453	1.05364	1.22327		1.26877	1.05884	1.32479	1.34255	1.34255	1.26714	1.17616	1.19991	1.18139		1.12711	1.0292	1.25342	1.12727	1.18162	1.18219	1.10411	1.58574	1.17201
			267	1.05384	1.09247	1.09878	1.11551	1.19396	1.21499	1.13615	1.04539	1.18738		1.33221	1.08989	1.34115	1.33552	1.33552	1.2782	1.19202	1.20934	1.18372		1.12294	1.08029	1.25342	1.12727	1.19774	1.17307	1.06882	1.57713	1.15233
			270	1.09666	1.11857	1.09174	1.11348	1.24781	1.21256	1.1655	1.06465	1.18439		1.22647	1.10852	1.33024	1.34724	1.34724	1.29146	1.22638	1.20462	1.18605		1.08119	1.09124	1.22717	1.13409	1.19083	1.14268	1.13436	1.5045	1.15795
			273	1.05384	1.08501	1.10231	1.09113	1.18928	1.18831	1.14663	1.0564	1.22028		1.34912	1.14889	1.34387	1.34724	1.34724	1.29146	1.16294	1.15512	1.19767		1.08537	1.16058	1.24029	1.14773	1.21617	1.17307	1.04361	1.579	1.15795
			276	1.11642	1.11857	1.11991	1.13786	1.20098	1.21499	1.13196	1.0729	1.24421		1.23916	1.13336	1.38204	1.24414	1.24414	1.2782	1.1603	1.18105	1.19535		1.11459	1.11314	1.22717	1.15227	1.21387	1.14876	1.06378	1.50065	1.12142
			279	1.06043	1.11111	1.12344	1.09723	1.15884	1.22226	1.14453	1.11692	1.20532		1.29414	1.08368	1.3466	1.31678	1.31678	1.2406	1.1418	1.19519	1.19767		1.08537	1.11679	1.24686	1.15909	1.19544	1.15788	1.17973	1.44399	1.20573
			282	1.05055	1.14467	1.16218	1.11145	1.21269	1.23196	1.11519	1.08391	1.17542		1.25608	1.05884	1.31934	1.27929	1.27929	1.2605	1.14973	1.1669	1.19535		1.09789	1.08759	1.26436	1.15227	1.20235	1.10318	1.0789	1.52364	1.19449
			285	1.10324	1.13721	1.15865	1.09723	1.22908	1.18831	1.1634	1.03164	1.19037		1.25608	1.04953	1.29481	1.23243	1.23243	1.2782	1.17352	1.1669	1.16047		1.13129	0.967153	1.21404	1.13409	1.19774	1.13964	1.09907	1.56603	1.1973
			288.2	1.00115	1.17077	1.10583	1.10332	1.2361	1.17861	1.13615	1.05364	1.16943		1.29837	1.07437	1.37386	1.31912	1.31912	1.2782	1.1418	1.17162	1.13721		1.10624	1.10584	1.23373	1.12045	1.21617	1.18219	1.1394	1.50973	1.18325
			291	1.10324	1.1484	1.15513	1.12567	1.21971	1.22954	1.13405	1.0674	1.17242		1.23916	1.1551	1.32479	1.28163	1.28163	1.27377	1.19995	1.15276	1.17907		1.11041	1.09124	1.19873	1.15682	1.17241	1.13053	1.03353	1.50839	1.18325
			294	1.08019	1.05891	1.09174	1.07894	1.18225	1.20044	1.15082	1.05089	1.19336		1.23916	1.06816	1.35478	1.28866	1.28866	1.24502	1.1418	1.15747	1.18837		1.07702	1.05109	1.18998	1.14773	1.17471	1.1518	1.07386	1.55047	1.17201
			297	1.10324	1.11484	1.13048	1.1277	1.19864	1.18589	1.17807	1.03714	1.22925		1.28991	1.05263	1.33842	1.33083	1.33083	1.2406	1.14709	1.17633	1.14651		1.07702	1.05475	1.22717	1.14773	1.20926	1.14572	1.08898	1.53908	1.19449
			300	1.06043	1.0962	1.11991	1.10942	1.1846	1.21014	1.12357	1.04814	1.24421		1.37873	1.11473	1.28663	1.30506	1.30506	1.27377	1.16294	1.18576	1.18372		1.07285	1.11314	1.24467	1.15682	1.1678	1.1518	1.14948	1.57299	1.15795
			303	1.08019	1.15213	1.11287	1.12974	1.20098	1.23439	1.11519	1.04539	1.15448		1.28568	1.11473	1.34115	1.27929	1.27929	1.25387	1.14709	1.18812	1.14884		1.12294	1.12774	1.26217	1.15682	1.14707	1.13053	1.05369	1.58769	1.15795
			306	1.04726	1.14467	1.12696	1.083	1.18928	1.20044	1.14453	1.0729	1.17242		1.2307	1.12094	1.30299	1.26289	1.26289	1.25166	1.16823	1.17397	1.16512		1.08954	1.08394	1.20748	1.12045	1.14707	1.13964	1.10915	1.45175	1.15233
			309	1.06043	1.16704	1.10935	1.11145	1.22674	1.20771	1.12567	1.04264	1.19635		1.26877	1.11163	1.31116	1.28632	1.28632	1.2406	1.13387	1.18812	1.13953		1.17303	1.09854	1.18998	1.11136	1.17471	1.17003	1.04865	1.49123	1.15233
			312	1.0769	1.08128	1.09174	1.08707	1.17523	1.23439	1.10051	1.0729	1.1814		1.19264	1.11473	1.32207	1.27929	1.27929	1.24945	1.16823	1.19283	1.16047		1.11876	1.10584	1.24904	1.14091	1.20465	1.14268	1.09907	1.48006	1.13828
			315	1.03079	1.13348	1.17274	1.12364	1.14246	1.21014	1.12357	1.0674	1.20832		1.25608	1.11163	1.34115	1.33318	1.33318	1.21628	1.15501	1.15983	1.15814		1.13964	1.10584	1.21842	1.15	1.17932	1.1518	1.14444	1.5058	1.1439
			318	1.04726	1.18195	1.12344	1.12567	1.16353	1.23924	1.12357	1.0674	1.21131		1.26031	1.13958	1.30844	1.31678	1.31678	1.20522	1.11537	1.17397	1.17674		1.10207	1.11314	1.26436	1.12955	1.17471	1.13053	1.11923	1.50839	1.18606
			321	1.05055	1.1484	1.14457	1.11348	1.14714	1.24166	1.13615	1.0729	1.16943		1.28991	1.08368	1.34115	1.28632	1.28632	1.22954	1.16294	1.18812	1.16047		1.20225	1.12409	1.22498	1.16818	1.20926	1.14572	1.15453	1.43887	1.15514
			324	1.06702	1.16331	1.12696	1.10535	1.22908	1.22954	1.15082	1.06465	1.17542		1.21379	1.12405	1.31389	1.24883	1.24883	1.20522	1.15766	1.17633	1.17442		1.08537	1.11679	1.22498	1.13182	1.15398	1.11533	1.21502	1.46559	1.17763
			327	1.00774	1.11857	1.12344	1.1277	1.1963	1.23681	1.11938	1.0619	1.13354		1.26454	1.08058	1.31934	1.25586	1.25586	1.19416	1.12594	1.16219	1.17442		1.10624	1.18613	1.18123	1.09545	1.14016	1.15484	1.10915	1.46159	1.15514
			330	1.10983	1.14467	1.08822	1.13177	1.18225	1.20771	1.15921	1.06465	1.17841		1.28146	1.10542	1.31934	1.24414	1.24414	1.22291	1.14973	1.19755	1.15814		1.15216	1.11314	1.21186	1.12273	1.1701	1.17003	1.13436	1.47597	1.17482
			333	1.03738	1.18195	1.15513	1.10942	1.14246	1.18589	1.15082	1.0729	1.19037		1.27723	1.14889	1.31934	1.32146	1.32146	1.2406	1.13916	1.17397	1.14884		1.11459	1.05839	1.21842	1.14091	1.17932	1.16092	1.10915	1.44145	1.18044
			336	1.02421	1.18568	1.10231	1.14802	1.23844	1.21741	1.10471	1.04539	1.19635		1.25608	1.13336	1.33842	1.31678	1.31678	1.25608	1.14444	1.17869	1.15116		1.09372	1.14599	1.27967	1.14318	1.17701	1.15484	1.08898	1.52165	1.20573
			339	1.0736	1.11484	1.11991	1.10942	1.19396	1.16163	1.09632	1.03164	1.17242		1.34489	1.14579	1.32752	1.28397	1.28397	1.19858	1.13916	1.19048	1.21628		1.11459	1.19343	1.26436	1.13636	1.18162	1.13964	1.13436	1.44289	1.1692
			342	1.09336	1.0701	1.15161	1.10129	1.21971	1.21499	1.14244	1.10867	1.1485		1.23916	1.16131	1.28936	1.28632	1.28632	1.21185	1.16559	1.1669	1.17674		1.12294	1.09124	1.25779	1.15	1.18623	1.14876	1.11923	1.43979	1.13547
			345.1	1.11642	1.11484	1.15161	1.12364	1.22908	1.21984	1.12148	1.09766	1.17841		1.31952	1.14268	1.29208	1.26992	1.26992	1.20522	1.11537	1.18105	1.20233		1.11041	1.11679	1.22279	1.11818	1.15628	1.13964	1.09403	1.42655	1.13828
			348	1.11971	1.14467	1.11287	1.10535	1.20332	1.24894	1.11938	1.05089	1.16046		1.28568	1.08368	1.30026	1.2418	1.2418	1.20301	1.14444	1.17633	1.16744		1.14381	1.09124	1.20529	1.14545	1.14246	1.14572	1.06882	1.46901	1.13828
			351.1	1.09666	1.11111	1.15161	1.083	1.17523	1.21014	1.15501	1.0564	1.19037		1.28991	1.04332	1.30026	1.26289	1.26289	1.20522	1.15237	1.18576	1.19302		1.09372	1.07664	1.21842	1.11591	1.18162	1.12749	1.05873	1.41953	1.13547
			354.1	1.05055	1.15585	1.14105	1.1277	1.17523	1.17619	1.12357	1.04814	1.17242		1.23493	1.0961	1.29481	1.32146	1.32146	1.22291	1.10744	1.16219	1.13721		1.10624	1.11314	1.20092	1.12955	1.19083	1.15484	1.08898	1.50185	1.16639
			357.1	1.09336	1.21178	1.12344	1.11755	1.16821	1.20529	1.16759	1.18887	1.16639		1.23916	1.13336	1.31934	1.26523	1.26523	1.23397	1.13387	1.12918	1.13953		1.15216	1.07299	1.23592	1.17045	1.18853	1.13964	1.06378	1.0148	1.18887
			376.4	1.23497	1.26398	1.23613	1.54831	1.98759	1.67334	1.42543	1.55984	1.80948		1.30683	1.10231	2.04443	1.50656	1.50656	1.73596	1.74706	1.49458	1.61163		1.10207	1.25182	1.73466	1.50455	1.58701	1.79	1.38644	1.21987	1.36594
			378	1.23497	1.28262	1.19387	1.5544	1.98525	1.64666	1.3835	1.54058	1.74667		1.30683	1.10542	1.9354	1.51593	1.51593	1.73817	1.7682	1.53937	1.61395		1.14799	1.22628	1.76091	1.47727	1.58701	1.77784	1.34611	1.2154	1.34064
			379.7	1.26791	1.29008	1.17979	1.5666	1.95248	1.66121	1.41285	1.58459	1.72574		1.3745	1.16752	2.02263	1.49953	1.49953	1.68067	1.76028	1.49693	1.64651		1.18973	1.20803	1.70622	1.53409	1.55707	1.82951	1.41165	1.15724	1.36594
			381.3	1.2218	1.36838	1.23261	1.57269	1.99227	1.66121	1.39608	1.54058	1.78256		1.35335	1.12405	1.94903	1.51828	1.51828	1.73153	1.70477	1.51579	1.61861		1.18556	1.25912	1.73029	1.54545	1.5824	1.78696	1.4066	1.17596	1.38842
			383	1.21851	1.36465	1.18683	1.5666	1.88692	1.63453	1.40866	1.50757	1.79752		1.32798	1.13336	1.95993	1.56748	1.56748	1.73153	1.74706	1.46393	1.66512		1.17721	1.22263	1.7631	1.52955	1.5133	1.82951	1.37635	1.18156	1.39966
			384.6	1.2251	1.35347	1.18683	1.54628	1.88927	1.65151	1.40447	1.55158	1.7706		1.36181	1.10231	2.06624	1.52999	1.52999	1.72269	1.73649	1.53465	1.63023		1.13546	1.12774	1.7456	1.54773	1.57089	1.71402	1.27552	1.12846	1.33221
			386.2	1.21851	1.24534	1.22909	1.55847	1.94779	1.67576	1.43381	1.48831	1.75564		1.29837	1.14579	2.01172	1.47376	1.47376	1.72048	1.67305	1.48751	1.64651		1.17303	1.17518	1.78278	1.53409	1.61926	1.76265	1.37635	1.20983	1.32097
			387.9	1.2712	1.34601	1.19387	1.5605	1.93843	1.65636	1.41914	1.51582	1.78555		1.26454	1.10231	1.95175	1.48313	1.48313	1.69615	1.80521	1.46865	1.64186		1.14381	1.15328	1.73247	1.48636	1.61235	1.78088	1.36627	1.1897	1.36031
			389.5	1.24485	1.29008	1.2467	1.54424	1.90331	1.69031	1.4422	1.55158	1.75564		1.34912	1.17373	1.96811	1.48547	1.48547	1.70942	1.81314	1.44743	1.62791		1.16051	1.21168	1.73029	1.47045	1.48566	1.84167	1.34106	1.1783	1.34907
			391.2	1.21521	1.30127	1.10935	1.55034	1.90565	1.65393	1.43591	1.53232	1.74667		1.25608	1.08679	2.03898	1.53936	1.53936	1.69836	1.7312	1.47336	1.57907		1.16886	1.24453	1.72591	1.53409	1.5824	1.80216	1.35619	1.1877	1.3575
			392.8	1.16582	1.32364	1.1657	1.54831	1.86117	1.71456	1.42333	1.54608	1.77359		1.26454	1.093	2.00354	1.5253	1.5253	1.68952	1.69155	1.52287	1.63953		1.15633	1.17518	1.73904	1.58864	1.5824	1.76873	1.41165	1.14855	1.36312
			394.5	1.29425	1.32364	1.14105	1.54424	1.83542	1.66849	1.41285	1.54883	1.80649		1.31106	1.14579	1.92994	1.4761	1.4761	1.7448	1.66777	1.41914	1.61628		1.20643	1.17518	1.71716	1.58182	1.53173	1.74138	1.47719	1.1269	1.33221
			396.1	1.28437	1.2528	1.1657	1.58285	1.82606	1.62241	1.40866	1.54058	1.75265		1.31106	1.10542	1.9463	1.50187	1.50187	1.68288	1.64662	1.43329	1.6093		1.08954	1.20073	1.73466	1.56364	1.51561	1.73226	1.37131	1.15086	1.30691
			399.1	1.2712	1.33855	1.11991	1.54221	1.8799	1.61756	1.41704	1.54333	1.80051		1.31106	1.21099	1.91631	1.44799	1.44799	1.7249	1.60434	1.438	1.55814		1.13964	1.16058	1.70404	1.46818	1.511	1.75657	1.3209	1.17386	1.3041
			402.1	1.25473	1.32737	1.15865	1.55237	1.85649	1.63696	1.40027	1.55158	1.77359		1.27723	1.1582	1.91359	1.46204	1.46204	1.67404	1.62812	1.438	1.6093		1.16886	1.19708	1.69966	1.47045	1.49948	1.74442	1.4671	1.1427	1.28724
			405.1	1.26461	1.30127	1.19387	1.61536	1.84479	1.63453	1.38769	1.53783	1.74667		1.28146	1.08058	1.97629	1.4925	1.4925	1.69615	1.60169	1.44979	1.56512		1.14799	1.19343	1.69529	1.47955	1.52943	1.71402	1.36123	1.16549	1.29848
			408.1	1.23497	1.30127	1.15513	1.59911	1.83776	1.63211	1.37302	1.44979	1.71975		1.34066	1.10542	1.9463	1.48782	1.48782	1.705	1.61755	1.37435	1.56046		1.17303	1.22628	1.70404	1.50455	1.42347	1.70491	1.35619	1.21721	1.26195
			411.1	1.21192	1.23415	1.19739	1.56456	1.81201	1.60786	1.37302	1.49656	1.79154		1.3026	1.18926	1.99537	1.46673	1.46673	1.75807	1.59376	1.405	1.55581		1.20225	1.18248	1.60779	1.48182	1.46954	1.7201	1.42173	1.17917	1.30973
			414.1	1.26132	1.30872	1.15865	1.5666	1.75582	1.61756	1.3856	1.44154	1.74069		1.33644	1.1582	1.92722	1.4597	1.4597	1.74923	1.60169	1.36492	1.53721		1.12294	1.12044	1.64497	1.49091	1.4419	1.68667	1.34106	1.22993	1.31535
			417.1	1.24485	1.24534	1.21148	1.61739	1.76753	1.67334	1.33948	1.38927	1.77658		1.33644	1.152	1.97629	1.49016	1.49016	1.79788	1.56733	1.38378	1.53488		1.15633	1.16423	1.63841	1.48409	1.43038	1.68667	1.33098	1.27421	1.28162
			420.1	1.1757	1.2528	1.11287	1.53612	1.73475	1.60058	1.31852	1.44154	1.76163		1.29414	1.14889	1.89451	1.42221	1.42221	1.72932	1.56205	1.35313	1.53954		1.10624	1.16788	1.66466	1.44091	1.49487	1.71099	1.33098	1.24525	1.29567
			423.1	1.123	1.28635	1.18683	1.50361	1.79328	1.59816	1.31433	1.48005	1.71676		1.31952	1.13647	1.86725	1.51125	1.51125	1.71384	1.58848	1.39793	1.56977		1.21895	1.21168	1.68216	1.47045	1.39813	1.67756	1.43685	1.18113	1.28443
			426.1	1.15594	1.31991	1.19387	1.53815	1.75114	1.60301	1.35416	1.4663	1.67788		1.29414	1.16752	2.01717	1.49016	1.49016	1.74701	1.53826	1.33663	1.52558		1.17721	1.20803	1.67997	1.51818	1.41656	1.62893	1.36123	1.15642	1.276
			429.1	1.23168	1.23415	1.11991	1.60927	1.73007	1.57633	1.28079	1.44979	1.74368		1.34489	1.1582	1.88905	1.50187	1.50187	1.72711	1.55147	1.32956	1.54419		1.13964	1.21533	1.70404	1.46818	1.40044	1.62589	1.40156	1.20197	1.26195
			432.1	1.20534	1.31618	1.18331	1.57269	1.69261	1.60543	1.33948	1.44429	1.73172		1.35758	1.14579	1.94903	1.45033	1.45033	1.77134	1.49333	1.32485	1.51395		1.16886	1.12774	1.66466	1.46364	1.43038	1.67148	1.36123	1.18743	1.26476
			435.1	1.19216	1.29754	1.17274	1.57472	1.70198	1.55936	1.34367	1.43604	1.72275		1.32798	1.18615	1.97629	1.43158	1.43158	1.74923	1.45632	1.36021	1.47907		1.21478	1.18248	1.62529	1.50455	1.43729	1.60158	1.4419	1.1981	1.25351
			438.1	1.19216	1.3311	1.14809	1.57472	1.72071	1.56421	1.34996	1.36176	1.75864		1.31106	1.13958	1.9572	1.42455	1.42455	1.79788	1.5039	1.34371	1.5		1.2273	1.14234	1.60779	1.39545	1.40965	1.6107	1.41165	1.28982	1.26476
			441.1	1.21192	1.29008	1.1657	1.5666	1.6973	1.56906	1.35625	1.35351	1.78555		1.2307	1.17684	1.89996	1.40347	1.40347	1.68288	1.48011	1.37907	1.46512		1.16886	1.17518	1.60341	1.42955	1.44881	1.65628	1.39652	1.28136	1.27881
			444.1	1.26132	1.29381	1.19739	1.5605	1.73007	1.61513	1.35835	1.43604	1.71377		1.3026	1.1582	1.97356	1.42455	1.42455	1.75144	1.54354	1.36257	1.48605		1.26905	1.15328	1.67122	1.46591	1.38662	1.60158	1.31586	1.21349	1.23665
			447.1	1.21851	1.26398	1.15865	1.55034	1.71837	1.56663	1.28917	1.37001	1.63601		1.36181	1.18615	1.89178	1.41284	1.41284	1.76913	1.51447	1.32956	1.50698		1.17303	1.20073	1.71279	1.48636	1.43038	1.59246	1.28056	1.25181	1.2507
			450.1	1.20204	1.28635	1.18683	1.56456	1.75582	1.58603	1.32691	1.40027	1.71078		1.3745	1.12094	1.8836	1.39175	1.39175	1.78682	1.49861	1.36492	1.47674		1.11041	1.15693	1.63185	1.48636	1.38662	1.64109	1.41669	1.2287	1.22822
			453.1	1.14935	1.29008	1.19035	1.60927	1.68325	1.56663	1.329	1.35351	1.74368		1.31106	1.12094	1.91631	1.39644	1.39644	1.80893	1.4669	1.38142	1.43256		1.16886	1.17518	1.62747	1.44318	1.40735	1.57727	1.3209	1.28952	1.276
			456.1	1.1724	1.33482	1.05652	1.56863	1.68793	1.55451	1.31433	1.34801	1.7048		1.30683	1.09921	1.96266	1.38707	1.38707	1.77134	1.55412	1.31777	1.47907		1.15633	1.21168	1.56841	1.44545	1.40044	1.61982	1.36123	1.25995	1.276
			459.1	1.28767	1.33482	1.20092	1.6052	1.68793	1.5448	1.30594	1.29574	1.70779		1.26031	1.17994	1.8727	1.3941	1.3941	1.84211	1.59376	1.34135	1.46046		1.15216	1.17883	1.61654	1.40227	1.35207	1.52256	1.48727	1.30865	1.23103
			462.1	1.19216	1.31245	1.20444	1.58895	1.65282	1.53268	1.31223	1.27098	1.77658		1.38296	1.19236	1.89451	1.41518	1.41518	1.72269	1.55676	1.35785	1.43023		1.1939	1.18978	1.64935	1.40682	1.38662	1.54384	1.33602	1.3298	1.23384
			465.1	1.1757	1.2267	1.12344	1.55034	1.73709	1.4963	1.35416	1.27923	1.67788		1.22225	1.16752	1.84272	1.42924	1.42924	1.73375	1.51976	1.31306	1.41628		1.12711	1.14599	1.60341	1.43636	1.36128	1.53472	1.36123	1.32553	1.27038
			468.1	1.24485	1.29754	1.20092	1.56456	1.66686	1.54965	1.28498	1.27648	1.6719		1.31106	1.22341	1.91086	1.37535	1.37535	1.75144	1.50126	1.32249	1.39767		1.14799	1.20073	1.59029	1.47727	1.37971	1.58335	1.25536	1.2981	1.2226
			471.1	1.1724	1.32364	1.17979	1.55644	1.66686	1.55208	1.329	1.35351	1.69882		1.31529	1.14889	1.97629	1.38238	1.38238	1.78461	1.47218	1.37907	1.4186		1.13129	1.17153	1.57498	1.45455	1.40044	1.56511	1.31081	1.24463	1.27319
			474.1	1.1757	1.24907	1.25374	1.55034	1.68559	1.54965	1.34367	1.24897	1.67788		1.36604	1.20478	1.98991	1.38941	1.38941	1.81336	1.5409	1.35785	1.46046		1.10624	1.12409	1.56404	1.48182	1.37971	1.556	1.43181	1.33112	1.23384
			477.1	1.19875	1.29008	1.16922	1.53612	1.64579	1.57148	1.33319	1.25722	1.69583		1.34489	1.16131	1.90268	1.38238	1.38238	1.81115	1.48804	1.29892	1.43023		1.13964	1.22263	1.60341	1.44773	1.3751	1.54688	1.41669	1.32897	1.24508
			480.1	1.19216	1.25652	1.19035	1.50361	1.64579	1.54238	1.32271	1.23521	1.64797		1.30683	1.17994	1.93812	1.38004	1.38004	1.75144	1.55147	1.3272	1.43023		1.21895	1.10949	1.59466	1.41364	1.38892	1.54384	1.41165	1.33476	1.25632
			483.1	1.20534	1.26771	1.15513	1.56253	1.64111	1.50115	1.30385	1.22696	1.6061		1.26031	1.13958	1.95448	1.37535	1.37535	1.75144	1.53561	1.27298	1.37209		1.20225	1.18613	1.59904	1.39545	1.35437	1.54384	1.3209	1.35274	1.26757
			486.1	1.20204	1.29008	1.15161	1.53612	1.63409	1.46962	1.31433	1.17744	1.59115		1.39142	1.21099	1.91086	1.38941	1.38941	1.72711	1.54883	1.28477	1.39535		1.11459	1.16788	1.63841	1.41818	1.34285	1.54384	1.4066	1.40729	1.27881
			489.1	1.25473	1.18568	1.1657	1.50564	1.61536	1.4866	1.32481	1.25447	1.64199		1.32798	1.16752	1.88088	1.43861	1.43861	1.75365	1.51976	1.30835	1.39767		1.15633	1.19343	1.6056	1.475	1.38662	1.50433	1.35619	1.34069	1.23665
			492.1	1.16252	1.28635	1.16922	1.51783	1.64813	1.49388	1.29127	1.23521	1.68386		1.29837	1.1551	1.9354	1.43393	1.43393	1.76028	1.50918	1.29892	1.39767		1.244	1.14963	1.58591	1.45682	1.32673	1.5256	1.35115	1.36159	1.23103
			495.1	1.16252	1.18568	1.17626	1.53205	1.58258	1.50843	1.32271	1.28473	1.6061		1.36604	1.13647	1.95175	1.35426	1.35426	1.72932	1.52504	1.34135	1.42558		1.20225	1.16058	1.55748	1.45455	1.32673	1.52864	1.34106	1.27257	1.21416
			498.1	1.17899	1.23788	1.23613	1.54018	1.56385	1.5254	1.31852	1.28473	1.59115		1.31529	1.1551	1.98446	1.35426	1.35426	1.79345	1.55676	1.31306	1.44419		1.16468	1.12044	1.60779	1.43182	1.37971	1.49217	1.33602	1.28761	1.2507
			501.1	1.19545	1.24161	1.12344	1.5605	1.60131	1.55208	1.31433	1.21596	1.65396		1.26877	1.13647	1.90814	1.39878	1.39878	1.75365	1.46954	1.2612	1.41395		1.1939	1.14234	1.6056	1.45227	1.3083	1.51345	1.45702	1.39905	1.25351
			504.1	1.22839	1.2006	1.15513	1.55847	1.58961	1.51813	1.33319	1.27098	1.55227		1.26031	1.13336	1.88088	1.40112	1.40112	1.77355	1.48011	1.35313	1.36977		1.21895	1.17883	1.5531	1.44773	1.32443	1.4861	1.39148	1.34066	1.22541
			507.1	1.23827	1.27517	1.1657	1.53205	1.6294	1.53025	1.32481	1.10867	1.38179		1.31952	1.14579	1.90268	1.4269	1.4269	1.75365	1.5039	1.30363	1.38605		1.20643	1.22628	1.56404	1.46364	1.35437	1.47394	1.32594	1.4921	1.20573

## Sheet: Figure 7E-F
	Figure 7—Source Data 1
	Figure 7—data table 3
	Figure 7E	Calicium ΔF/F0 (GSK790A)	DMSO	AngII	AngII+GSK3874			Figure 6F	Calicium ΔF/F0 (A23187)	DMSO	AngII	AngII+GSK3874
			1.13618	1.26454	1.23565					1.23497	1.30683	1.10207
			1.17077	1.1551	1.09124					1.26398	1.10231	1.25182
			1.1657	1.83999	1.38685					1.23613	2.04443	1.73466
			1.21508	1.55108	1.31136					1.54831	1.50656	1.50455
			1.27122	1.55108	1.28757					1.98759	1.50656	1.58701
			1.25621	1.59443	1.26425					1.67334	1.73596	1.79
			1.22629	1.4854	1.12932					1.42543	1.74706	1.38644
			1.30124	1.32249	1.43258					1.55984	1.49458	1.21987
			1.45357	1.28372	1.36875					1.80948	1.61163	1.36594
			1.10654	1.29837	1.23565					1.23497	1.30683	1.14799
			1.1745	1.10542	1.14599					1.28262	1.10542	1.22628
			1.18331	1.80455	1.41529					1.19387	1.9354	1.76091
			1.19679	1.55342	1.28182					1.5544	1.51593	1.47727
			1.26888	1.55342	1.26224					1.98525	1.51593	1.58701
			1.23439	1.56789	1.27336					1.64666	1.73817	1.77784
			1.24306	1.44575	1.18982					1.3835	1.7682	1.34611
			1.20495	1.28477	1.52414					1.54058	1.53937	1.2154
			1.43562	1.33023	1.38842					1.74667	1.61395	1.34064

## Sheet: Figure 7G
	Figure 7—Source Data 1
	Figure 7—data table 4
	Figure 7G	Calcium F/F0	Time (s)	DMSO							PE							PE+GSK3874
			0	1.04634	1.03028	1.00056	0.951728	1.02356	0.930697		0.994092	1.01739	0.9569	0.991074	0.983975	0.966941		1.04352	0.973976	0.999872	0.977404	0.968141	1.00806
			3	0.98281	1.02332	1.00337	0.998727	0.968725	1.01066		1.00632	1.02479	0.917359	0.994152	1.00928	1.04011		1.01807	0.968822	0.987053	0.973901	0.974327	1.03399
			6	1.0426	1.00592	0.975267	0.998727	0.984972	0.972901		0.973722	1.03219	0.980625	1.00954	1.0149	1.00876		1.03334	0.958516	1.005	1.00893	0.974327	0.996544
			9	1.0015	1.0268	1.03148	1.00656	0.989033	1.01288		0.998167	1.01739	1.02017	1.02185	1.01209	1.02966		1.02316	1.03582	1.00244	0.984411	0.971234	1.00806
			12	1.00897	1.01288	1.00337	0.996769	0.997157	0.981786		1.00224	1.00999	0.980625	1.01877	1.00647	1.0375		1.03334	0.999742	1.00756	0.959888	1.00216	1.02246
			15	1.01271	1.0094	0.980888	0.998727	0.974817	0.966237		0.994092	1.02849	0.968762	1.00954	1.00365	0.993075		1.0028	1.06158	1.005	0.99492	1.00216	0.990783
			18	0.98281	0.981552	0.983699	1.01439	1.0134	1.00178		0.998167	1.02849	1.02017	0.991074	0.981164	1.04273		1.01807	1.03066	1.01525	0.987914	1.02382	1.0023
			21	0.975336	1.00244	0.983699	0.981103	1.01747	1.00622		0.994092	0.976693	0.972716	1.01877	0.983975	0.982621		0.987529	0.994589	0.994744	1.02295	0.989793	0.982143
			24	1.01644	1.00244	0.983699	1.00852	0.991064	0.999556		0.961499	1.01739	0.988533	0.99723	1.00647	0.951261		1.03334	0.999742	1.00756	0.987914	1.01144	0.982143
			27	1.0015	0.991994	1.02586	1.00069	0.964663	1.01733		0.953351	0.972993	1.00435	0.981841	1.0149	0.966941		1.02825	1.03582	1.04089	1.02995	1.01763	0.987903
			30	0.964126	0.957188	0.997752	1.01831	1.00122	1.03065		1.00632	0.969293	0.988533	0.981841	0.983975	0.951261		0.987529	1.02036	0.999872	0.99492	1.00216	1.01382
			33	0.997758	0.995475	1.01462	1.0046	1.04793	0.992892		0.961499	0.991491	1.00435	0.969529	1.01209	0.998301		0.982438	1.04097	0.987053	1.01944	1.00526	1.00518
			36	0.956652	1.01288	1.00337	1.00852	1.01137	1.00844		1.01446	0.980392	1.03598	1.03109	1.00928	1.02705		0.982438	0.984282	1.01269	0.998424	1.02072	1.01958
			39	0.93423	1.00592	0.99213	1.01831	0.944354	1.04842		1.03076	0.958195	1.03203	1.02801	1.01771	1.04273		0.956987	0.963669	1.01782	0.991417	1.04547	1.0167
			42	0.997758	0.988514	1.0118	0.985019	1.00934	0.977343		1.03483	0.969293	1.00039	1.03724	0.986787	0.998301		0.936625	0.979129	0.97167	1.06148	1.0331	0.993664
			45	0.986547	0.978072	1.02305	1.00852	1.00528	1.03065		1.03891	0.984092	1.02807	0.994152	1.00084	0.946034		0.987529	1.02036	0.989617	1.03346	0.958862	0.990783
			48	1.01644	1.00592	1.01743	0.977186	1.03777	1.00622		0.998167	0.99889	1.02412	0.987996	1.01771	0.995688		0.967167	1.01005	1.00244	1.01944	0.980513	0.959101
			51	1.02392	1.00244	0.983699	0.998727	0.960601	0.98845		0.994092	0.99889	1.03203	1.00954	0.992409	0.998301		0.962077	0.984282	0.976798	0.991417	0.995979	0.985023
			54	1.01271	0.985033	0.986509	1.00852	1.02559	1.004		1.04706	1.00629	1.02807	0.95414	0.97273	0.995688		1.02825	0.973976	1.00756	0.984411	1.01763	0.987903
			57	1.03886	0.981552	0.997752	1.01635	1.03168	1.01288		0.998167	1.01739	1.01621	0.972607	0.989598	1.02705		0.987529	0.963669	0.969107	0.977404	1.00526	1.01382
			73	1.1846	1.35398	1.36875	1.26701	1.17384	1.54598		1.7104	1.58643	1.5242	1.40272	1.48255	1.51631		1.48638	1.43777	1.27163	1.39779	1.2558	1.20104
			74.6	1.17713	1.3331	1.38842	1.30422	1.25101	1.43936		1.72744	1.54643	1.46698	1.36348	1.46753	1.46609		1.45584	1.35532	1.22036	1.35575	1.24961	1.22984
			76.2	1.16592	1.34006	1.3828	1.29639	1.2957	1.47046		1.70411	1.59082	1.44326	1.32656	1.42817	1.48711		1.46602	1.33471	1.27163	1.2997	1.24961	1.2212
			77.9	1.15844	1.30526	1.38842	1.34926	1.16166	1.41493		1.68262	1.53452	1.45512	1.3358	1.44504	1.48961		1.44566	1.34501	1.22548	1.2962	1.2991	1.23272
			79.5	1.15844	1.29133	1.39966	1.30422	1.16978	1.41715		1.6867	1.56493	1.42349	1.3635	1.43941	1.47393		1.44566	1.28833	1.29471	1.28569	1.23106	1.23272
			81.2	1.19955	1.31222	1.33783	1.3238	1.20024	1.47046		1.65003	1.56123	1.47489	1.30194	1.4366	1.57063		1.44057	1.37078	1.24087	1.33824	1.27127	1.23848
			82.8	1.22945	1.34006	1.30973	1.35318	1.16775	1.44825		1.71522	1.46874	1.41162	1.34195	1.43379	1.53927		1.41512	1.31925	1.26394	1.31722	1.23415	1.2788
			84.5	1.18834	1.27741	1.32378	1.32184	1.23883	1.42603		1.75596	1.46134	1.40767	1.32964	1.40568	1.51574		1.45075	1.35017	1.27932	1.2927	1.22796	1.2356
			86.1	1.16592	1.29829	1.32097	1.27093	1.18197	1.43492		1.69892	1.47244	1.41162	1.35119	1.37194	1.5262		1.44057	1.4017	1.24087	1.26817	1.2558	1.21832
			87.8	1.19208	1.35051	1.3294	1.28464	1.16572	1.41937		1.67447	1.49094	1.45907	1.32041	1.32134	1.51052		1.41512	1.3244	1.27932	1.27168	1.2125	1.2068
			90	1.18087	1.32962	1.31816	1.3003	1.16572	1.36828		1.65818	1.50943	1.4314	1.37581	1.33258	1.53143		1.49147	1.26256	1.22805	1.27868	1.22796	1.21544
			93	1.14724	1.32614	1.31535	1.25135	1.17587	1.43714		1.68262	1.52053	1.4314	1.36657	1.3607	1.56279		1.45584	1.25741	1.24343	1.21562	1.22487	1.21832
			96	1.19208	1.32962	1.31535	1.28268	1.16775	1.39271		1.68262	1.53163	1.45907	1.28963	1.36913	1.47654		1.48638	1.27287	1.27676	1.21212	1.23724	1.18088
			99	1.13976	1.32962	1.30973	1.18281	1.24289	1.41271		1.66225	1.49464	1.46303	1.38812	1.37194	1.51052		1.47111	1.2368	1.25112	1.27168	1.19084	1.2212
			102	1.15471	1.27741	1.30129	1.24351	1.16775	1.32386		1.70707	1.49464	1.46698	1.31425	1.36913	1.50268		1.4253	1.28317	1.29983	1.21913	1.21559	1.1924
			105	1.16218	1.29481	1.35188	1.24743	1.20837	1.32608		1.6541	1.53533	1.46303	1.30502	1.34102	1.50268		1.45075	1.25225	1.32291	1.19811	1.22796	1.1924
			108	1.12481	1.30526	1.36312	1.2768	1.25101	1.3283		1.62559	1.51313	1.42349	1.265	1.28479	1.50791		1.39985	1.26256	1.25112	1.25066	1.19394	1.18952
			111	1.10987	1.32614	1.31535	1.21806	1.19009	1.29942		1.69892	1.45024	1.49466	1.31425	1.29041	1.487		1.45075	1.24195	1.21267	1.25766	1.18775	1.18952
			114	1.06876	1.28089	1.30691	1.28464	1.14135	1.3283		1.60522	1.54643	1.45512	1.31733	1.30166	1.48439		1.48638	1.30894	1.25368	1.30671	1.2558	1.20968
			117	1.1136	1.30874	1.31816	1.27093	1.13119	1.31053		1.62966	1.47244	1.43535	1.32964	1.33258	1.45825		1.49656	1.2471	1.26394	1.25066	1.2094	1.18088
			120	1.11734	1.32962	1.33502	1.22785	1.13526	1.33496		1.60633	1.52793	1.47489	1.33887	1.33258	1.4478		1.48129	1.29348	1.23574	1.2927	1.2125	1.19528
			123	1.12481	1.28089	1.3294	1.25526	1.16775	1.27055		1.62559	1.57603	1.44326	1.31733	1.31009	1.46087		1.48638	1.24195	1.2383	1.26117	1.20631	1.16935
			126	1.12855	1.35051	1.28162	1.24743	1.17384	1.24833		1.60522	1.50204	1.51443	1.27424	1.31853	1.43473		1.4762	1.24195	1.24856	1.21913	1.20012	1.15783
			129	1.09492	1.33658	1.26195	1.25526	1.13729	1.26388		1.63781	1.50943	1.44721	1.36657	1.30166	1.43996		1.55256	1.1698	1.24856	1.24365	1.19084	1.15495
			132	1.10239	1.32266	1.32378	1.24743	1.16166	1.23056		1.61818	1.50204	1.42744	1.31117	1.3129	1.50791		1.55256	1.22649	1.23061	1.25416	1.23106	1.18088
			135	1.09865	1.3331	1.29848	1.26114	1.17587	1.2661		1.63781	1.47614	1.39976	1.35426	1.25949	1.48439		1.54238	1.2368	1.22805	1.20161	1.17847	1.18664
			138	1.05008	1.3331	1.28162	1.22393	1.14744	1.24389		1.60188	1.50204	1.47884	1.36042	1.30447	1.49484		1.56274	1.1698	1.18959	1.24015	1.19394	1.1924
			141	1.03886	1.34354	1.31535	1.19651	1.1515	1.23501		1.56855	1.53163	1.47094	1.28347	1.27917	1.42689		1.44566	1.23164	1.21267	1.28569	1.20631	1.19528
			144	1.08371	1.29481	1.27881	1.20435	1.11698	1.24167		1.57448	1.53903	1.46698	1.31117	1.28198	1.37462		1.49147	1.18526	1.21267	1.22613	1.16301	1.16647
			147	1.05008	1.27393	1.27038	1.20043	1.12713	1.17281		1.50114	1.49833	1.44721	1.3358	1.27636	1.40337		1.52202	1.26256	1.20497	1.25416	1.20631	1.15495
			150	1.05381	1.29829	1.2507	1.20826	1.13322	1.2239		1.50114	1.49094	1.46303	1.27424	1.2623	1.36417		1.49147	1.22134	1.25112	1.23664	1.2094	1.08007
			153	1.12108	1.33658	1.23946	1.24547	1.17384	1.24611		1.56447	1.56493	1.43535	1.31733	1.29041	1.39553		1.51693	1.2368	1.29214	1.21212	1.18466	1.15207
			156	1.09865	1.31918	1.27038	1.17301	1.13119	1.26832		1.54818	1.50204	1.49071	1.38196	1.30166	1.41121		1.49147	1.15949	1.2665	1.22964	1.14445	1.14631
			159	1.12855	1.32962	1.26757	1.24351	1.14338	1.28832		1.55632	1.50204	1.45117	1.33887	1.26511	1.45825		1.50165	1.17495	1.22292	1.24015	1.16919	1.12903
			162	1.10239	1.32614	1.29567	1.1926	1.08448	1.26832		1.55225	1.45764	1.40767	1.28347	1.27073	1.42428		1.51184	1.14919	1.2101	1.25766	1.13517	1.12903
			165	1.09118	1.31222	1.24789	1.21218	1.10885	1.2661		1.55225	1.49464	1.43535	1.3358	1.28479	1.3903		1.50165	1.1698	1.24087	1.1876	1.19703	1.16071
			168	1.08744	1.30177	1.2226	1.18868	1.15963	1.21279		1.48484	1.43163	1.39976	1.31425	1.27354	1.34326		1.45584	1.17495	1.27163	1.23664	1.18775	1.13767
			171	1.10239	1.31918	1.21979	1.22785	1.11088	1.2239		1.4767	1.49464	1.39185	1.25577	1.28479	1.35769		1.4762	1.19557	1.25625	1.23664	1.20631	1.12039
			174	1.13602	1.30177	1.2226	1.18868	1.14744	1.24611		1.53188	1.51903	1.34045	1.32041	1.30728	1.3511		1.49147	1.14403	1.24599	1.17359	1.13517	1.13767
			177	1.11734	1.31222	1.18887	1.24351	1.10073	1.21279		1.5141	1.50943	1.34836	1.34195	1.25949	1.35633		1.46602	1.1698	1.2742	1.23664	1.14135	1.14631
			180	1.05381	1.30874	1.22541	1.15931	1.12713	1.18836		1.5041	1.50943	1.3314	1.32964	1.25949	1.32497		1.4253	1.15949	1.26907	1.1876	1.14135	1.11463
			183	1.04634	1.31222	1.22822	1.21218	1.0987	1.20613		1.49595	1.50204	1.38395	1.27581	1.26511	1.34065		1.33876	1.15434	1.26907	1.26117	1.14754	1.12039
			186	1.09118	1.3157	1.25913	1.24743	1.1251	1.24833		1.5141	1.44284	1.41953	1.3358	1.27354	1.32758		1.42021	1.11827	1.2383	1.26117	1.16301	1.15495
			189	1.06502	1.30177	1.22541	1.22589	1.13729	1.22612		1.51151	1.46493	1.39976	1.34195	1.2876	1.36156		1.36421	1.11312	1.24856	1.24365	1.15373	1.15207
			192	1.05381	1.28089	1.20573	1.24351	1.11698	1.16837		1.51966	1.50423	1.40372	1.25885	1.2623	1.36985		1.3744	1.12858	1.22805	1.25766	1.17229	1.10887
			195	1.06876	1.27741	1.1692	1.19651	1.15556	1.23279		1.50336	1.48683	1.34441	1.31425	1.27354	1.36417		1.37949	1.19042	1.19472	1.21562	1.12589	1.13191
			198	1.09118	1.3157	1.20011	1.22197	1.15353	1.24611		1.50003	1.47603	1.3365	1.3358	1.26792	1.35644		1.33876	1.16465	1.22548	1.23314	1.15991	1.13767
			201	1.09118	1.31222	1.21416	1.17889	1.13526	1.20613		1.49188	1.44573	1.31388	1.32964	1.27636	1.37076		1.32858	1.19042	1.24599	1.1876	1.11352	1.12903
			204	1.07997	1.35398	1.20011	1.22393	1.13322	1.1817		1.47781	1.45273	1.32681	1.29578	1.2876	1.35894		1.38458	1.16465	1.22292	1.21913	1.13826	1.11175
			207	1.09865	1.30177	1.18325	1.21218	1.12104	1.23056		1.46595	1.40013	1.34045	1.31733	1.237	1.36417		1.36421	1.12342	1.25625	1.18059	1.11352	1.11175
			210	1.09865	1.32266	1.15795	1.18477	1.13729	1.16615		1.47077	1.42233	1.31163	1.31811	1.29323	1.36156		1.31331	1.16465	1.23061	1.21913	1.13207	1.10887
			213	1.12855	1.32962	1.17763	1.22785	1.12307	1.15504		1.42521	1.41683	1.36813	1.34811	1.31571	1.29884		1.35912	1.13888	1.2383	1.1946	1.1197	1.16071
			216	1.10987	1.34354	1.18325	1.19651	1.11292	1.14394		1.44336	1.45833	1.32463	1.25577	1.27917	1.30201		1.30313	1.16465	1.2383	1.1946	1.17847	1.13479
			219	1.06876	1.32962	1.16358	1.15735	1.15353	1.19947		1.43336	1.41643	1.37999	1.31425	1.28479	1.35292		1.27259	1.16465	1.23061	1.20511	1.13517	1.11463
			222	1.07997	1.33658	1.21135	1.18477	1.11495	1.20613		1.41484	1.40643	1.36022	1.28196	1.21732	1.37201		1.35912	1.15434	1.23061	1.19811	1.10424	1.11463
			225	1.12481	1.34006	1.20011	1.17889	1.16369	1.16171		1.42669	1.42493	1.31558	1.31733	1.23981	1.34849		1.34385	1.15949	1.23317	1.1946	1.12589	1.13479
			228	1.12108	1.30874	1.17763	1.21414	1.10073	1.17059		1.43669	1.42464	1.32068	1.2927	1.237	1.3586		1.38458	1.15949	1.22805	1.24015	1.10733	1.08583
			231	1.10987	1.3331	1.18044	1.2631	1.14947	1.18614		1.44632	1.41313	1.35231	1.27116	1.28479	1.34588		1.39476	1.13888	1.26394	1.24015	1.13517	1.09735
			234	1.08371	1.32614	1.16639	1.16518	1.14744	1.18836		1.44225	1.40123	1.34836	1.30194	1.22856	1.32246		1.37949	1.1698	1.21779	1.21562	1.11352	1.08007
			237	1.12855	1.28785	1.14952	1.1926	1.1515	1.17503		1.46262	1.40164	1.27719	1.29578	1.26792	1.34326		1.41512	1.11827	1.2383	1.18059	1.15373	1.10023
			240	1.15844	1.29133	1.15514	1.2161	1.12307	1.20835		1.43817	1.40753	1.26022	1.28347	1.24824	1.34065		1.34385	1.08735	1.25112	1.19811	1.13207	1.10311
			243	1.12855	1.32962	1.16076	1.19456	1.12307	1.19947		1.44077	1.42493	1.28905	1.3635	1.237	1.3294		1.37949	1.11827	1.24087	1.20862	1.07949	1.10311
			246	1.11734	1.32266	1.16639	1.21218	1.11088	1.15726		1.45447	1.42053	1.36022	1.2373	1.23419	1.3302		1.32858	1.11827	1.26138	1.18409	1.07949	1.09159
			249	1.12108	1.3331	1.15795	1.20631	1.16369	1.20169		1.44225	1.40227	1.32859	1.28963	1.22856	1.30553		1.39985	1.14919	1.24599	1.1911	1.06712	1.09735
			252	1.08744	1.28785	1.19449	1.17497	1.12307	1.19947		1.41447	1.41053	1.293	1.31117	1.29604	1.3119		1.31331	1.13373	1.22036	1.17359	1.11661	1.08295
			255	1.07623	1.28089	1.18887	1.18868	1.15556	1.16615		1.42595	1.39134	1.28905	1.28655	1.23138	1.34849		1.30313	1.20588	1.22805	1.19811	1.10114	1.10023
			258	1.1136	1.29481	1.17763	1.17301	1.13322	1.13061		1.40558	1.42434	1.28905	1.36965	1.27917	1.32246		1.32858	1.13888	1.26394	1.20161	1.08568	1.08583
			261	1.10239	1.25653	1.1973	1.18477	1.0987	1.17281		1.4178	1.38203	1.28114	1.32656	1.28198	1.3119		1.39476	1.17495	1.26138	1.18409	1.13207	1.07719
			264	1.08744	1.29481	1.17201	1.20826	1.14947	1.16615		1.40966	1.40174	1.31277	1.2927	1.24262	1.27201		1.43039	1.18011	1.19985	1.22964	1.11661	1.11463
			267	1.10613	1.30526	1.15233	1.17301	1.10885	1.19947		1.41077	1.42024	1.29185	1.27424	1.19483	1.32758		1.35403	1.09766	1.28189	1.19811	1.09496	1.10887
			270	1.08371	1.27393	1.15795	1.18477	1.11901	1.19502		1.45447	1.40914	1.30882	1.27732	1.25105	1.27201		1.36421	1.12342	1.23061	1.17709	1.12589	1.08007
			273	1.09865	1.23912	1.15795	1.13385	1.08448	1.15282		1.40595	1.38914	1.30486	1.29578	1.23138	1.29622		1.34385	1.11827	1.20497	1.18409	1.08568	1.08871
			276	1.10987	1.25653	1.12142	1.19456	1.08245	1.17059		1.39743	1.38694	1.28022	1.29578	1.24543	1.30542		1.32349	1.07189	1.24087	1.14206	1.09805	1.11463
			279	1.1136	1.24957	1.20573	1.16714	1.09058	1.18392		1.35262	1.39984	1.2444	1.32041	1.24824	1.32417		1.39985	1.12858	1.25881	1.19811	1.10114	1.09735
			282	1.10987	1.24957	1.19449	1.17301	1.11495	1.13283		1.32558	1.35134	1.23254	1.28655	1.22294	1.32724		1.4253	1.13373	1.2742	1.21562	1.14135	1.07719
			285	1.15844	1.2252	1.1973	1.13189	1.1515	1.1817		1.34558	1.38874	1.2365	1.29578	1.28479	1.31588		1.33367	1.1698	1.2383	1.22964	1.12589	1.07431
			288.2	1.13229	1.24608	1.18325	1.17693	1.12307	1.20169		1.35151	1.33434	1.26859	1.28039	1.24262	1.32758		1.3184	1.11827	1.24087	1.21212	1.06403	1.08871
			291	1.06876	1.30526	1.18325	1.14952	1.16572	1.18392		1.34188	1.33914	1.23254	1.26193	1.22575	1.27905		1.31331	1.12858	1.22292	1.14206	1.0764	1.09159
			294	1.10613	1.24957	1.17201	1.12014	1.08855	1.14394		1.37706	1.37943	1.20905	1.25269	1.23792	1.2911		1.37949	1.12342	1.24856	1.1911	1.10114	1.08583
			297	1.09865	1.3157	1.19449	1.18085	1.15556	1.2239		1.30137	1.31654	1.25523	1.31733	1.23981	1.28849		1.32349	1.14403	1.26394	1.1911	1.09187	1.11751
			300	1.09118	1.26697	1.15795	1.16714	1.13119	1.15504		1.29336	1.35354	1.2665	1.31425	1.21451	1.31905		1.35403	1.16465	1.27163	1.22964	1.03928	1.10311
			303	1.09118	1.27045	1.15795	1.18085	1.09058	1.19058		1.35706	1.34244	1.25185	1.2927	1.23419	1.28054		1.25732	1.15949	1.25625	1.26117	1.06403	1.10599
			306	1.06502	1.32266	1.15233	1.1691	1.17587	1.14394		1.32188	1.30845	1.24879	1.28347	1.24824	1.30929		1.3744	1.14919	1.26907	1.21913	1.10424	1.10311
			309	1.09118	1.30526	1.15233	1.20631	1.10885	1.1817		1.33706	1.28694	1.23681	1.26808	1.21732	1.31485		1.2675	1.12342	1.27932	1.21562	1.08877	1.09735
			312	1.07997	1.23564	1.13828	1.13972	1.19009	1.13949		1.34077	1.33874	1.24114	1.30887	1.23138	1.27724		1.28277	1.14403	1.23574	1.1911	1.13517	1.13191
			315	1.10987	1.22172	1.1439	1.11622	1.12713	1.15726		1.30558	1.31284	1.2265	1.26808	1.25387	1.3011		1.3184	1.20072	1.25625	1.21562	1.08877	1.10311
			318	1.10239	1.24957	1.18606	1.1691	1.12713	1.19058		1.32706	1.30174	1.24045	1.24961	1.22575	1.30145		1.28277	1.11312	1.19728	1.17008	1.11661	1.08295
			321	1.09865	1.23912	1.15514	1.16714	1.10885	1.18614		1.29225	1.27215	1.25418	1.30502	1.24262	1.2511		1.27259	1.20072	1.19728	1.1946	1.11352	1.05703
			324	1.06502	1.25305	1.17763	1.1691	1.14541	1.17725		1.28706	1.28039	1.25486	1.32041	1.25105	1.2511		1.27768	1.12342	1.23061	1.18409	1.10733	1.05991
			327	1.07623	1.23564	1.15514	1.14952	1.13932	1.18836		1.23521	1.29724	1.25068	1.26808	1.22575	1.23804		1.30313	1.11312	1.25112	1.19811	1.11352	1.08007
			330	1.09118	1.21476	1.17482	1.18085	1.14744	1.22168		1.24299	1.29354	1.21231	1.22348	1.20607	1.26076		1.24205	1.16465	1.26394	1.1911	1.09805	1.10887
			333	1.08371	1.23564	1.18044	1.1691	1.13729	1.16837		1.23669	1.32376	1.24509	1.20809	1.22575	1.22236		1.24205	1.1698	1.23574	1.21913	1.09805	1.08871
			336	1.10239	1.2426	1.20573	1.21218	1.12713	1.19947		1.23521	1.31284	1.26882	1.18963	1.23419	1.21201		1.25732	1.14403	1.28701	1.24015	1.11661	1.09735
			339	1.06129	1.26697	1.1692	1.19456	1.12307	1.12394		1.24743	1.25984	1.253	1.14654	1.24543	1.24724		1.27259	1.15949	1.23061	1.22613	1.08568	1.08007
			342	1.13976	1.20084	1.13547	1.19064	1.16775	1.12839		1.2241	1.29284	1.20045	1.16501	1.22575	1.251		1.26241	1.13373	1.26394	1.1911	1.12898	1.12039
			345.1	1.08371	1.21476	1.13828	1.18281	1.14135	1.15726		1.20248	1.28694	1.20208	1.18963	1.20073	1.2286		1.26241	1.14919	1.2101	1.27868	1.11352	1.06567
			348	1.06876	1.2252	1.13828	1.14952	1.15963	1.17281		1.20928	1.27204	1.19254	1.18039	1.23981	1.2086		1.26241	1.21103	1.26394	1.17359	1.10114	1.07431
			351.1	1.07623	1.23912	1.13547	1.20826	1.1515	1.19947		1.13003	1.26134	1.22068	1.17116	1.21732	1.20815		1.2675	1.16465	1.23061	1.23664	1.13207	1.12615
			354.1	1.07623	1.27741	1.16639	1.18085	1.14338	1.19058		1.2178	1.29064	1.2065	1.18347	1.20607	1.24054		1.28277	1.13888	1.24087	1.17709	1.09496	1.06567
			357.1	1.06502	1.2426	1.18887	1.18868	1.52315	1.16615		1.20447	1.27464	1.21045	1.14041	1.167	1.20372		1.2675	1.07189	1.23317	1.1876	1.08877	1.11175
			376.4	1.32661	1.58719	1.36594	1.46872	1.44192	1.37717		1.78004	1.59152	1.52234	1.38196	1.2623	1.56002		1.74599	1.82943	1.26394	1.2927	1.26508	1.40553
			378	1.27429	1.58719	1.34064	1.39038	1.5069	1.35051		1.76374	1.68291	1.50652	1.41582	1.27354	1.45548		1.69509	1.75728	1.2742	1.23314	1.28673	1.38825
			379.7	1.27429	1.60111	1.36594	1.45305	1.45207	1.33496		1.76374	1.60152	1.46303	1.42505	1.2623	1.53911		1.70018	1.75728	1.25368	1.32072	1.26508	1.43433
			381.3	1.22945	1.63244	1.38842	1.40018	1.46019	1.34607		1.75559	1.57932	1.41558	1.37889	1.27636	1.46855		1.67982	1.69544	1.25368	1.30671	1.28673	1.42281
			383	1.30418	1.6394	1.39966	1.40801	1.5394	1.43714		1.80448	1.65332	1.4393	1.3912	1.21451	1.479		1.63909	1.79851	1.31265	1.2997	1.31147	1.41705
			384.6	1.27429	1.56631	1.33221	1.48438	1.49878	1.3283		1.7393	1.58672	1.45512	1.40043	1.2623	1.58092		1.5831	1.75728	1.32547	1.35926	1.27127	1.39689
			386.2	1.32287	1.49669	1.32097	1.44522	1.4541	1.36606		1.70263	1.54603	1.41162	1.41274	1.26511	1.52866		1.634	1.82427	1.29471	1.35225	1.21559	1.40841
			387.9	1.28924	1.5315	1.36031	1.40213	1.46629	1.3705		1.67003	1.65332	1.4393	1.36657	1.28479	1.47116		1.67473	1.77789	1.29983	1.34174	1.28054	1.42569
			389.5	1.30045	1.53846	1.34907	1.41388	1.51909	1.36162		1.73115	1.61632	1.46698	1.40966	1.24543	1.48684		1.71545	1.79335	1.31009	1.38728	1.26199	1.43145
			391.2	1.25561	1.54194	1.3575	1.4648	1.49269	1.3283		1.7393	1.60152	1.47489	1.35426	1.29041	1.55479		1.76126	1.73151	1.24856	1.36977	1.26508	1.35945
			392.8	1.25561	1.57675	1.36312	1.43934	1.43786	1.36828		1.67003	1.60892	1.47094	1.34503	1.31571	1.52082		1.72563	1.73151	1.2383	1.36276	1.23106	1.41129
			394.5	1.25561	1.56631	1.33221	1.38647	1.45004	1.33274		1.62929	1.60892	1.49862	1.40351	1.37475	1.45026		1.67473	1.73151	1.27932	1.36977	1.3022	1.37097
			396.1	1.2145	1.52106	1.30691	1.39822	1.4277	1.39716		1.68226	1.61262	1.51839	1.37581	1.32415	1.46593		1.71545	1.67483	1.25625	1.43633	1.28982	1.36809
			399.1	1.24813	1.51062	1.3041	1.37668	1.42567	1.3705		1.65781	1.63482	1.44326	1.3912	1.2876	1.43719		1.62382	1.72121	1.28445	1.49588	1.25889	1.36233
			402.1	1.24066	1.46885	1.28724	1.37472	1.47238	1.38827		1.67818	1.61262	1.41953	1.40351	1.34664	1.43457		1.634	1.7109	1.3024	1.5169	1.33003	1.32489
			405.1	1.19582	1.48973	1.29848	1.41976	1.45004	1.33052		1.67818	1.62742	1.4314	1.38812	1.32134	1.49468		1.64418	1.64906	1.34085	1.47837	1.31766	1.38249
			408.1	1.19582	1.5141	1.26195	1.39822	1.4866	1.30831		1.68633	1.63112	1.4393	1.45891	1.3607	1.46593		1.67473	1.64906	1.3588	1.5169	1.27127	1.35369
			411.1	1.22945	1.51758	1.30973	1.43347	1.43582	1.3594		1.66596	1.59782	1.45907	1.42505	1.39443	1.51297		1.72054	1.69544	1.31265	1.50639	1.29601	1.39401
			414.1	1.24066	1.49669	1.31535	1.38451	1.47238	1.36828		1.62929	1.59042	1.4828	1.40966	1.36351	1.44764		1.76126	1.7109	1.29727	1.52041	1.28982	1.41129
			417.1	1.22197	1.50017	1.28162	1.41976	1.41145	1.34829		1.5967	1.60522	1.5342	1.42813	1.4113	1.49468		1.75617	1.68513	1.32034	1.56945	1.32694	1.32777
			420.1	1.21824	1.48973	1.29567	1.36101	1.39115	1.31941		1.60077	1.58672	1.51839	1.42813	1.37756	1.41628		1.71545	1.67998	1.31522	1.52041	1.3022	1.33641
			423.1	1.20703	1.53846	1.28443	1.34143	1.50284	1.37272		1.58448	1.59412	1.51048	1.43737	1.41411	1.39015		1.78671	1.66452	1.36649	1.56945	1.28054	1.34505
			426.1	1.20703	1.47233	1.276	1.44913	1.40739	1.37939		1.65781	1.57192	1.46698	1.45276	1.42255	1.53388		1.76635	1.66452	1.32291	1.54143	1.32385	1.36521
			429.1	1.24439	1.54542	1.26195	1.35709	1.45207	1.40382		1.613	1.56452	1.50652	1.47738	1.45066	1.41105		1.82744	1.71605	1.33573	1.56595	1.32385	1.33353
			432.1	1.25187	1.46189	1.26476	1.40018	1.47238	1.3394		1.63744	1.54973	1.49071	1.4466	1.45347	1.46855		1.77653	1.72636	1.33316	1.56245	1.33931	1.37673
			435.1	1.22571	1.47929	1.25351	1.41976	1.45816	1.36606		1.5804	1.53123	1.52629	1.37581	1.43941	1.49468		1.7409	1.69029	1.31009	1.52741	1.28364	1.31336
			438.1	1.19582	1.45493	1.26476	1.40605	1.41552	1.39271		1.62929	1.56082	1.62515	1.4466	1.48721	1.47639		1.78162	1.64906	1.34855	1.56595	1.36715	1.33929
			441.1	1.26682	1.50713	1.27881	1.36493	1.47035	1.37939		1.64152	1.53863	1.49071	1.4466	1.50689	1.42151		1.78162	1.74697	1.34085	1.48537	1.35169	1.35081
			444.1	1.23692	1.44796	1.23665	1.4178	1.40942	1.35051		1.64152	1.54233	1.56584	1.36965	1.4113	1.49207		1.75617	1.70575	1.32291	1.56595	1.30838	1.2932
			447.1	1.27055	1.49321	1.2507	1.35905	1.40333	1.37717		1.63337	1.52753	1.49466	1.44044	1.47315	1.41367		1.64928	1.75213	1.3588	1.56595	1.27436	1.35369
			450.1	1.24813	1.43752	1.22822	1.35318	1.4277	1.36162		1.63337	1.54233	1.49071	1.42198	1.50127	1.40583		1.67982	1.72121	1.3588	1.55194	1.33313	1.2932
			453.1	1.24813	1.54194	1.276	1.37668	1.46223	1.41048		1.64966	1.46833	1.5342	1.39735	1.51532	1.43719		1.64418	1.72121	1.38187	1.55544	1.31147	1.33353
			456.1	1.22571	1.47233	1.276	1.40997	1.39521	1.42381		1.5804	1.56822	1.60142	1.45276	1.52094	1.48161		1.65945	1.69029	1.34342	1.52391	1.25889	1.35657
			459.1	1.27429	1.47233	1.23103	1.34534	1.41145	1.39494		1.63337	1.57932	1.50652	1.4189	1.5097	1.39537		1.61364	1.75728	1.387	1.56595	1.30838	1.32489
			462.1	1.23318	1.48625	1.23384	1.36101	1.37287	1.44602		1.57633	1.53493	1.54607	1.45276	1.49283	1.41628		1.634	1.70059	1.34855	1.53792	1.31457	1.31048
			465.1	1.24066	1.47581	1.27038	1.3238	1.42364	1.44158		1.58448	1.47573	1.5777	1.45583	1.48721	1.36663		1.77653	1.7109	1.37675	1.53442	1.30529	1.31624
			468.1	1.2145	1.41316	1.2226	1.37276	1.47238	1.35718		1.56818	1.50903	1.51839	1.48661	1.48159	1.43196		1.61364	1.67483	1.387	1.53442	1.33003	1.22408
			471.1	1.24439	1.38879	1.27319	1.41976	1.48253	1.44158		1.62522	1.49053	1.51048	1.47738	1.50408	1.49468		1.65945	1.71605	1.39213	1.52741	1.33622	1.32777
			474.1	1.22945	1.43056	1.23384	1.42955	1.41755	1.40604		1.57633	1.53493	1.53816	1.47122	1.53781	1.50775		1.70018	1.69544	1.37675	1.54143	1.33931	1.32201
			477.1	1.2145	1.39575	1.24508	1.36688	1.44395	1.37717		1.57225	1.47943	1.49071	1.48353	1.47596	1.42412		1.68491	1.67483	1.37675	1.54843	1.28673	1.32777
			480.1	1.22571	1.45841	1.25632	1.39234	1.45613	1.40604		1.64966	1.53123	1.54211	1.47738	1.47877	1.45809		1.68491	1.69029	1.36136	1.5169	1.3022	1.32777
			483.1	1.26308	1.42012	1.26757	1.40409	1.42364	1.42381		1.51114	1.55343	1.53816	1.42198	1.55468	1.47378		1.73072	1.74182	1.40751	1.53442	1.32694	1.2644
			486.1	1.19955	1.39575	1.27881	1.37276	1.4013	1.39271		1.52337	1.49053	1.5342	1.46814	1.53781	1.43196		1.72563	1.65421	1.37162	1.49939	1.23724	1.34793
			489.1	1.17713	1.44448	1.23665	1.35122	1.44192	1.43714		1.53151	1.48313	1.52234	1.47122	1.49564	1.40321		1.71036	1.62329	1.37162	1.54843	1.29601	1.30472
			492.1	1.30045	1.43404	1.23103	1.39038	1.4541	1.41048		1.54781	1.57192	1.54211	1.5297	1.45066	1.45548		1.69509	1.79335	1.35624	1.49939	1.32694	1.25288
			495.1	1.22945	1.40968	1.21416	1.40213	1.47847	1.40604		1.57633	1.56452	1.54211	1.49277	1.4844	1.47116		1.68491	1.69544	1.38187	1.47486	1.2991	1.32201
			498.1	1.17713	1.45144	1.2507	1.42563	1.42161	1.44158		1.56818	1.57192	1.47884	1.45276	1.49283	1.50252		1.69509	1.62329	1.42546	1.49939	1.28364	1.30184
			501.1	1.22571	1.441	1.25351	1.3708	1.4013	1.45935		1.5804	1.52753	1.55002	1.48969	1.49564	1.42935		1.67473	1.69029	1.39213	1.59748	1.24961	1.29608
			504.1	1.25187	1.45841	1.22541	1.35122	1.41755	1.43936		1.56411	1.44984	1.50257	1.49585	1.47596	1.40321		1.66964	1.72636	1.38956	1.50639	1.27745	1.29032
			507.1	1.22571	1.46537	1.20573	1.36688	1.33834	1.39494		1.53966	1.49053	1.47094	1.44044	1.47877	1.42412		1.59837	1.69029	1.41264	1.54143	1.27127	1.33065

## Sheet: Figure 7H-I
	Figure 7—Source Data 1
	Figure 7—data table 5
	Figure 7H	Calicium ΔF/F0 (GSK790A)	DMSO	PE	PE+GSK3874			Figure 7I	Calicium ΔF/F0 (A23187)	DMSO	PE	PE+GSK3874
			1.1846	1.7104	1.48638					1.32661	1.78004	1.74599
			1.17713	1.72744	1.45584					1.27429	1.76374	1.69509
			1.35398	1.58643	1.43777					1.58719	1.59152	1.82943
			1.3331	1.54643	1.35532					1.58719	1.68291	1.75728
			1.36875	1.5242	1.27163					1.36594	1.52234	1.26394
			1.38842	1.46698	1.22036					1.34064	1.50652	1.2742
			1.26701	1.40272	1.39779					1.46872	1.38196	1.2927
			1.30422	1.36348	1.35575					1.39038	1.41582	1.23314
			1.17384	1.48255	1.2558					1.44192	1.2623	1.26508
			1.25101	1.46753	1.24961					1.5069	1.27354	1.28673
			1.54598	1.58631	1.20104					1.37717	1.56002	1.40553
			1.43936	1.46609	1.22984					1.35051	1.45548	1.38825
