# Supplementary material for: Activation of transient receptor potential vanilloid 4 is involved in pressure overload-induced cardiac hypertrophy
Source: eLife. 2022 Jun 22;11:e74519. doi: 10.7554/eLife.74519 (PMC9224988; doi:10.7554/eLife.74519)
Supplement: Figure 8—source data 1. [file elife-74519-fig8-data1.xlsx]

## Sheet: figure8-source data 1
	Figure 8—Source Data 1
	Figure8—Source Table 1
		Figure8 B	p-CaMKII/CaMKII protein	DMSO	GSK790A	GSK790A+GSK3874		Figure 8D	p-CaMKII/CaMKII protein	GSK790A+ Ca2+ free	GSK790A+ Ca2+
				0.819348	1.58609	1.12201				0.799703	2.39042
				1.18065	1.56634	0.950101				0.914115	3.27631
				0.879844	1.79967	1.4974				1.28618	3.20955
				1.12016	1.89303	1.37784				1.11897	2.5153
										0.889569	3.15301
										0.991463	6.5409
		Figure 8F	p-CaMKII/CaMKII protein	DMSO	AngII	AngII+ GSK3874
				0.883834	1.94141	1.16919
				1.11617	2.37169	0.986691
				0.689296	1.73409	1.16755
				1.3107	1.92604	0.704074
		Figure 8H	p-CaMKII/CaMKII protein	WT 2 d		WT 1 w		WT 2 w		WT 4 w
				Sham	TAC	Sham	TAC	Sham	TAC	Sham	TAC
				0.790034	1.06523	1.08904	1.54078	0.515894	3.81659	0.808677	2.44791
				1.09067	0.78737	1.00391	1.26705	1.90353	2.11458	1.19132	2.01159
				1.1193	0.957416	0.907053	1.40859	0.580579	3.29398	1.17668	3.26896
				0.93039	1.04708	0.913345	1.51256	0.628964	3.88596	0.823319	3.15779
				0.875052	0.90355	1.00296	1.62333	1.25825	2.37707	0.781948	2.16414
				1.19456	0.783952	1.08369	1.70214	1.11279	1.03798	1.21805	2.09368
		Figure 8I	p-CaMKII/CaMKII protein
				Trpv4 KO 1 w		Trpv4 KO 4w
				Sham	TAC	Sham	TAC
				0.982156	1.05618	0.954351	1.42414
				0.949258	1.20677	0.728896	1.20877
				1.06859	1.0791	1.32914	1.99205
				1.13678	0.96223	1.36145	1.47187
				0.996373	0.856499	1.28818	1.1641
				0.866845	1.15909	1.06639	1.1108
