# Supplementary material for: Activation of transient receptor potential vanilloid 4 is involved in pressure overload-induced cardiac hypertrophy
Source: eLife. 2022 Jun 22;11:e74519. doi: 10.7554/eLife.74519 (PMC9224988; doi:10.7554/eLife.74519)
Supplement: Figure 9—source data 1. [file elife-74519-fig9-data1.xlsx]

## Sheet: Figure 9-source data 1
	Figure 9—Source Data 1
	Figure 9—data table 1
	Figure 9B	p-p65/p65 protein	DMSO	GSK790A	GSK790A+GSK3874		Figure 9D	p-p65/p65 protein	DMSO	AngII	AngII+GSK3874
			0.837333	2.52905	1.35898				0.745158	1.46069	0.982527
			1.16267	2.36767	0.864208				1.25484	1.51221	0.890105
			0.844501	2.34938	0.819991				0.801786	2.75181	2.31842
			1.1555	1.46817	1.12041				1.19821	3.51405	1.72497
			0.935149	1.95372	0.782681				0.989335	2.25314	1.62455
			1.06485	1.5799	1.11424				1.01066	2.42456	1.03106
	Figure 9F	p-p65/p65 protein	DMSO	GSK790A	GSK790A+KN92	GSK790A+KN93
			0.558612	1.84672	2.5134	1.37345
			1.44139	2.85542	2.51978	0.936486
			0.887571	2.34127	2.67989	0.875392
			1.11243	3.03985	2.31504	0.806413
			0.976721	1.74249	1.90536	0.879831
			1.02328	1.81724	1.81893	0.922322
