# Supplementary material for: Activation of transient receptor potential vanilloid 4 is involved in pressure overload-induced cardiac hypertrophy
Source: eLife. 2022 Jun 22;11:e74519. doi: 10.7554/eLife.74519 (PMC9224988; doi:10.7554/eLife.74519)
Supplement: Table 1—source data 1. [file elife-74519-table1-data1.xlsx]

## Sheet: table 1-source data
	Table 1-source data 1
Echocardiographic measurements	TAC 4W	Heart rate (bpm)	LVAW,s (mm)	LVID,d (mm)	LVPW,s (mm)	Diameter,s (mm)	Diameter,d (mm)	Volume,s (μL)	Volume,d (μL)	Stroke volume (μL)
WT	sham1	442.804	1.05926	3.47315	1.14074	2.19297	3.49281	16.3419	50.6469	34.305
	sham2	445.063	1.29074	3.34491	1.23565	1.83211	3.18834	10.2077	40.6541	30.4464
	sham3	459.477	1.275	3.43935	1.16481	2.15795	3.35586	15.454	45.9789	30.5249
	sham4	460.874	1.3537	3.20324	1.25926	2.03576	3.1963	13.3208	40.8459	27.5251
	sham5	463.544	1.26713	3.24259	0.975926	2.09264	3.23763	14.3053	42.1561	27.8508
	sham6	473.918	1.50324	3.23472	1.25926	2.0021	3.26388	12.774	42.9854	30.2115
	TAC 1	477.691	1.32407	0.865741	1.08981	2.84469	3.78744	30.748	61.4911	30.7431
	TAC 2	465.793	1.33426	0.916667	0.906481	3.57617	4.33386	53.5967	84.6194	31.0227
	TAC 3	473.528	1.45648	1.96574	2.45463	2.74538	3.56197	28.1814	53.0656	24.8842
	TAC 4	463.918	1.76296	1.18056	1.6213	1.8176	2.83381	10.0469	30.4822	20.4353
	TAC 5	430.108	1.29074	0.724074	1.05463	2.5488	3.62408	23.4385	55.3644	31.9259
	TAC 6	467.608	1.275	0.826389	1.30648	2.48449	3.56823	22.0259	53.3301	31.3042
Trpv4 KO	sham1	466.548	1.04907	0.641667	1.00833	1.7493	2.89419	9.13348	32.0645	22.931
	sham2	456.998	1.42454	1.29861	1.65278	1.28902	2.37311	4.1963	19.6159	15.4196
	sham3	436.231	1.18843	0.684722	1.18843	1.69581	2.9974	8.36308	34.9462	26.5831
	sham4	450.07	1.0287	0.702778	1.06944	2.04683	3.37804	13.5163	46.8856	33.3693
	sham5	433.866	1.08611	1.52685	1.85741	1.34066	2.37102	4.51645	19.5575	15.0411
	sham6	483.627	1.49537	0.692593	1.21204	2.01625	3.17777	13.0404	40.3063	27.2659
	TAC 1	437.557	1.19167	0.865741	1.89444	1.59929	2.93498	7.18383	33.1833	25.9995
	TAC 2	451.481	1.55046	1.77083	1.9125	1.32823	2.28712	4.42992	17.8808	13.4509
	TAC 3	459.184	1.44028	0.834259	1.21204	2.28293	3.44527	17.8122	49.0251	31.2129
	TAC 4	433.474	1.42454	0.779167	1.22778	2.18912	3.50783	16.0299	51.1566	35.1267
	TAC 5	446.65	1.62917	0.983796	1.58194	1.56443	2.91027	6.76183	32.5188	25.757
	TAC 6	434.324	1.65278	0.881481	1.70787	1.81406	3.18413	9.92015	40.4888	30.5687
